# Supplementary material for: Flux Balance Analysis Inspired Bioprocess Upgrading for Lycopene Production by a Metabolically Engineered Strain of Yarrowia lipolytica
Source: MDPI journal article supplement (doi:10.3390/metabo5040794), 2015-12-21
Supplement: s1 [file s1]

- A: CuCl2-2H2O
- B: NiSO4-6H2O
- C: CoCl2-6H2O
- D: MgSO4-7H2O
- E: NiCl2-6H2O
- F: H3BO3
- G: ZnCl2
- H: MnSO4-7H2O
- J: KI
- K: MnCl2-4H2O
- L: FeSO4-7H2O
- M: Na2MoO4-2H2O
- N: FeCl3-6H2O
- O: KNO3
- P: NaCl
- Q: Glucose
- R: Fructose
- S: Yeast extract
- T: (NH4)2SO4
- U: KH2PO4
- V: K2HPO4
- W: Vitamine B1
- X: BaCl2-2H2O
- Positive Effects
- Negative Effects

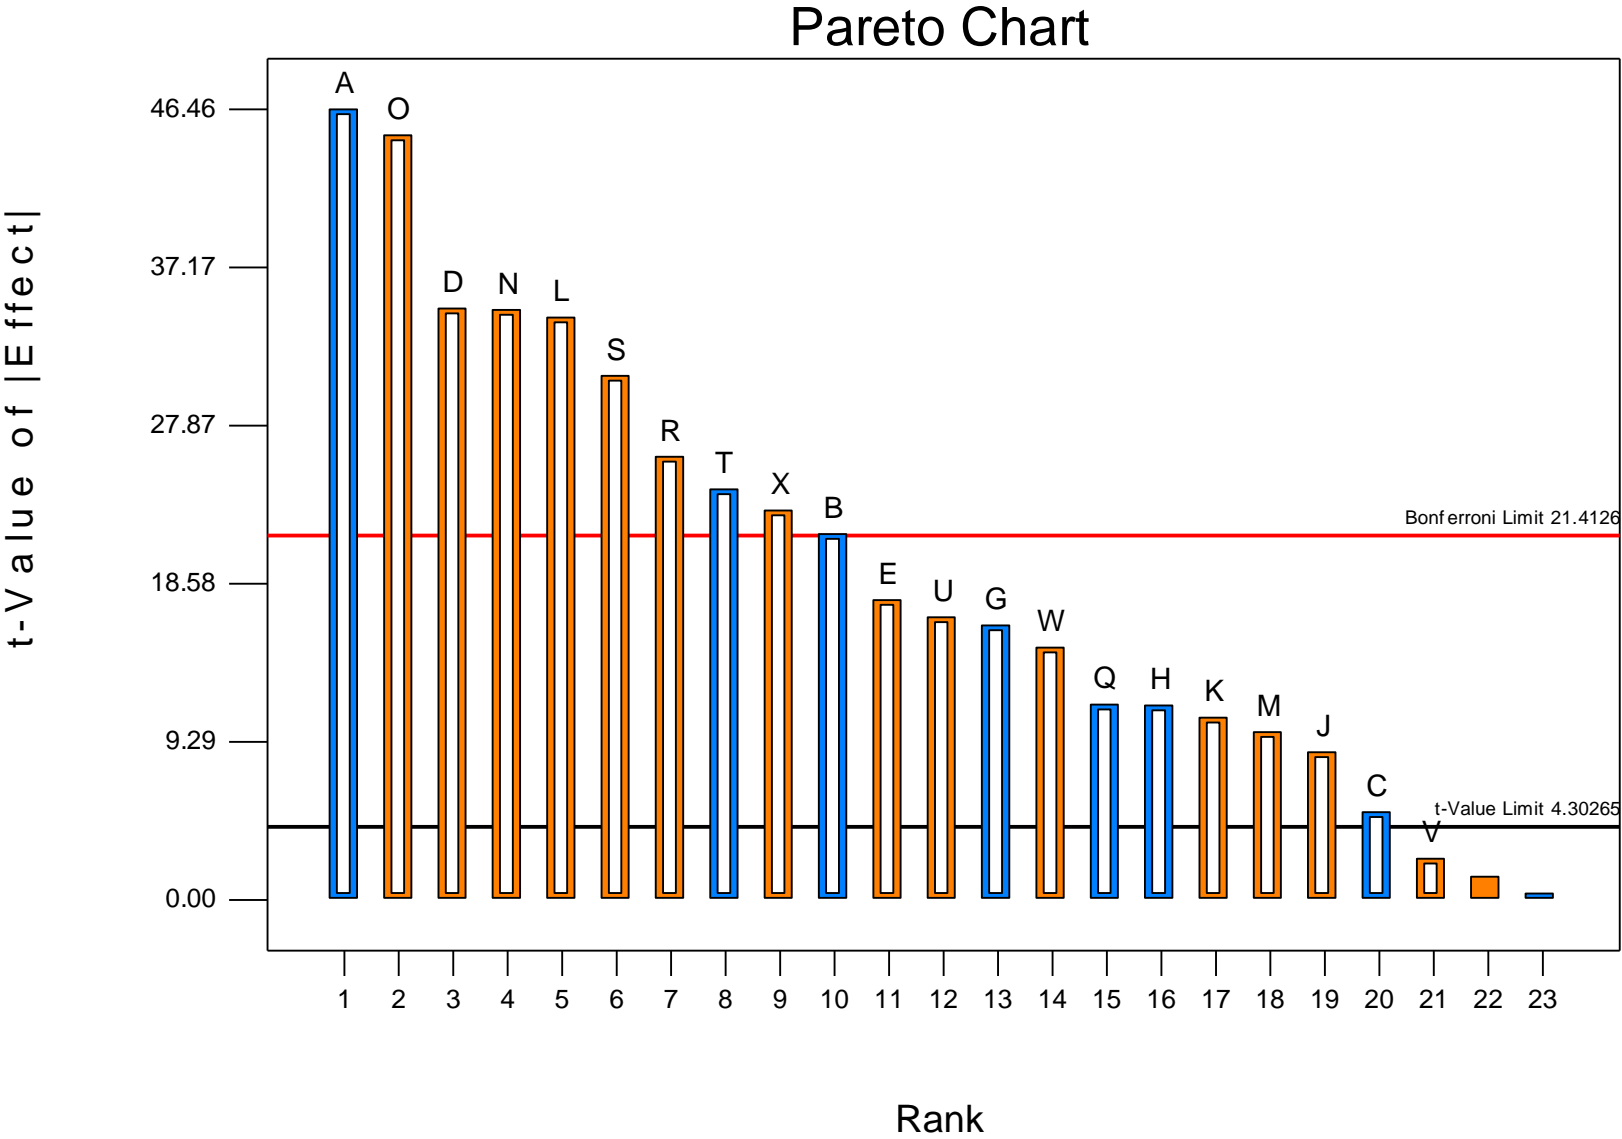

Fig S1: Pareto chart of the effects of chemical compounds selected according literature and preliminary experiments on biomass production by the engineered strain Po1f-1312E+1269IB

- A: CuCl2-2H2O
  - B: NiSO4-6H2O
  - C: CoCl2-6H2O
  - D: MgSO4-7H2O
  - E: NiCl2-6H2O
  - F: H3BO3
  - G: ZnCl2
  - H: MnSO4-7H2O
  - J: KI
  - K: MnCl2-4H2O
  - L: FeSO4-7H2O
  - M: Na2MoO4-2H2O
  - N: FeCl3-6H2O
  - O: KNO3
  - P: NaCl
  - Q: Glucose
  - R: Fructose
  - S: Yeast extract
  - T: (NH4)2SO4
  - U: KH2PO4
  - V: K2HPO4
  - W: Vitamine B1
  - X: BaCl2-2H2O
- Positive Effects  
■ Negative Effects

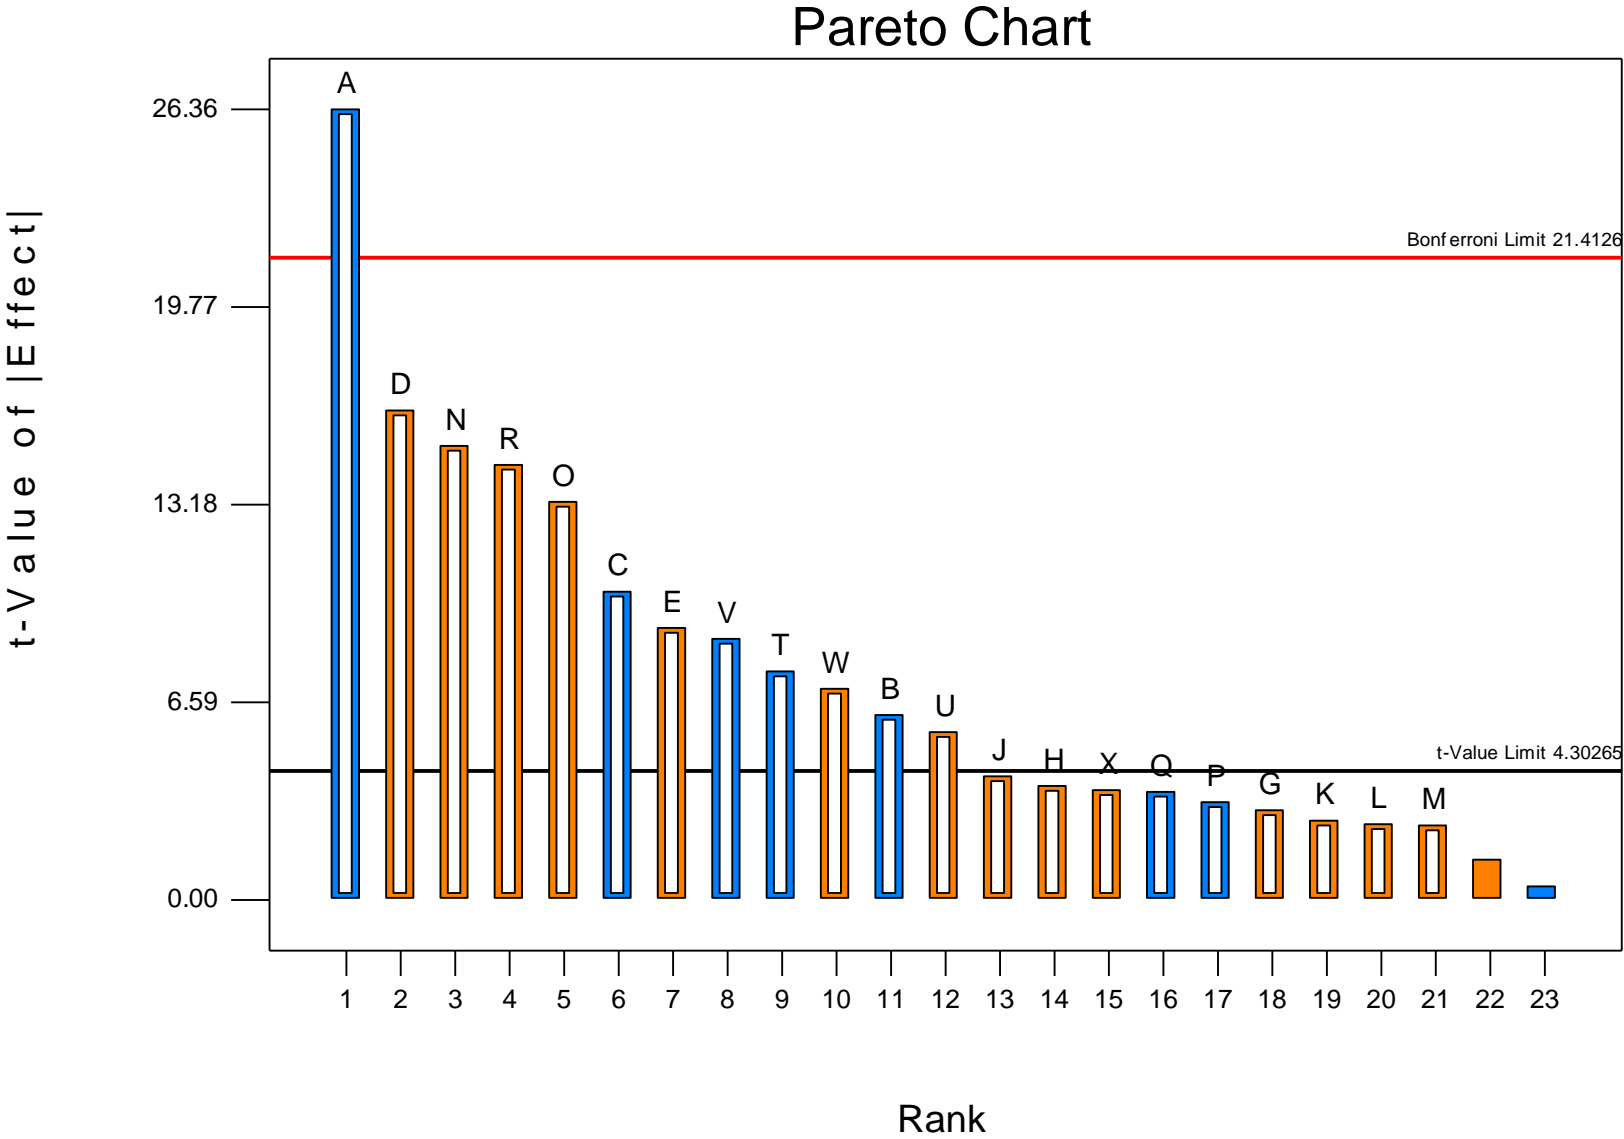

Fig S2: Pareto chart of the effects of chemical compounds selected according literature and preliminary experiments on lycopene production by the engineered strain Po1f-1312E+1269IB

- A: CuCl2-2H2O
  - B: NiSO4-6H2O
  - C: CoCl2-6H2O
  - D: MgSO4-7H2O
  - E: NiCl2-6H2O
  - F: H3BO3
  - G: ZnCl2
  - H: MnSO4-7H2O
  - J: KI
  - K: MnCl2-4H2O
  - L: FeSO4-7H2O
  - M: Na2MoO4-2H2O
  - N: FeCl3-6H2O
  - O: KNO3
  - P: NaCl
  - Q: Glucose
  - R: Fructose
  - S: Yeast extract
  - T: (NH4)2SO4
  - U: KH2PO4
  - V: K2HPO4
  - W: Vitamine B1
  - X: BaCl2-2H2O
- Positive Effects
- Negative Effects

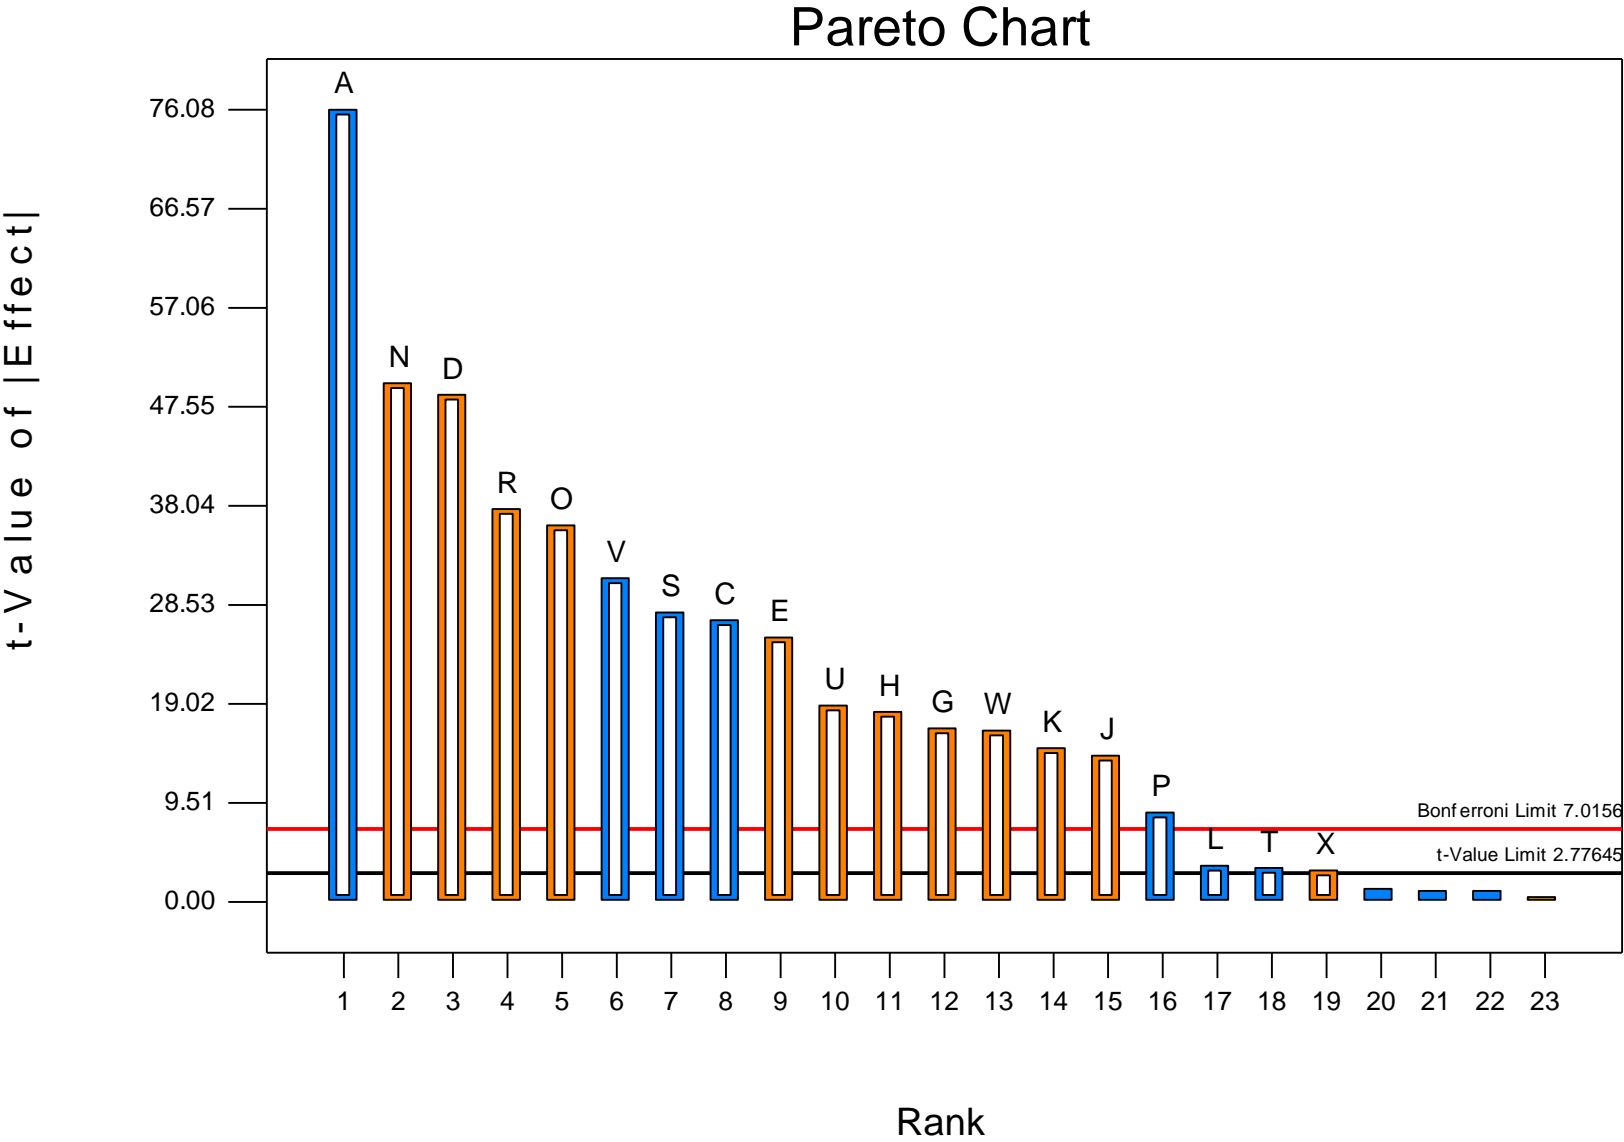

Fig S3: Pareto chart of the effects of chemical compounds selected according literature and preliminary experiments on lycopene content of the engineered strain Po1f-1312E+1269IB

- A: Thiamine pyrophosphate
- B: Pyridoxine, hydrochloride
- C: nicotinate
- D: Succinate
- E: 4 Aminobutyric acid
- F: KH<sub>2</sub>PO<sub>4</sub>
- G: (NH<sub>4</sub>)<sub>2</sub>SO<sub>4</sub>
- H: Urea
- J: Sulfite Na<sub>2</sub>SO<sub>3</sub>
- K: Ergosterol
- L: Ethanolamine
- M: Hypoxanthine
- N: Guanine
- O: L Histidine
- P: L Methionine
- Q: L Lysine
- R: L Tryptophan
- S: L Valine
- T: L Asparagine
- U: L isoleucine
- V: L Leucine
- W: D glucose
- X: D Fructose
- Positive Effects
- Negative Effects

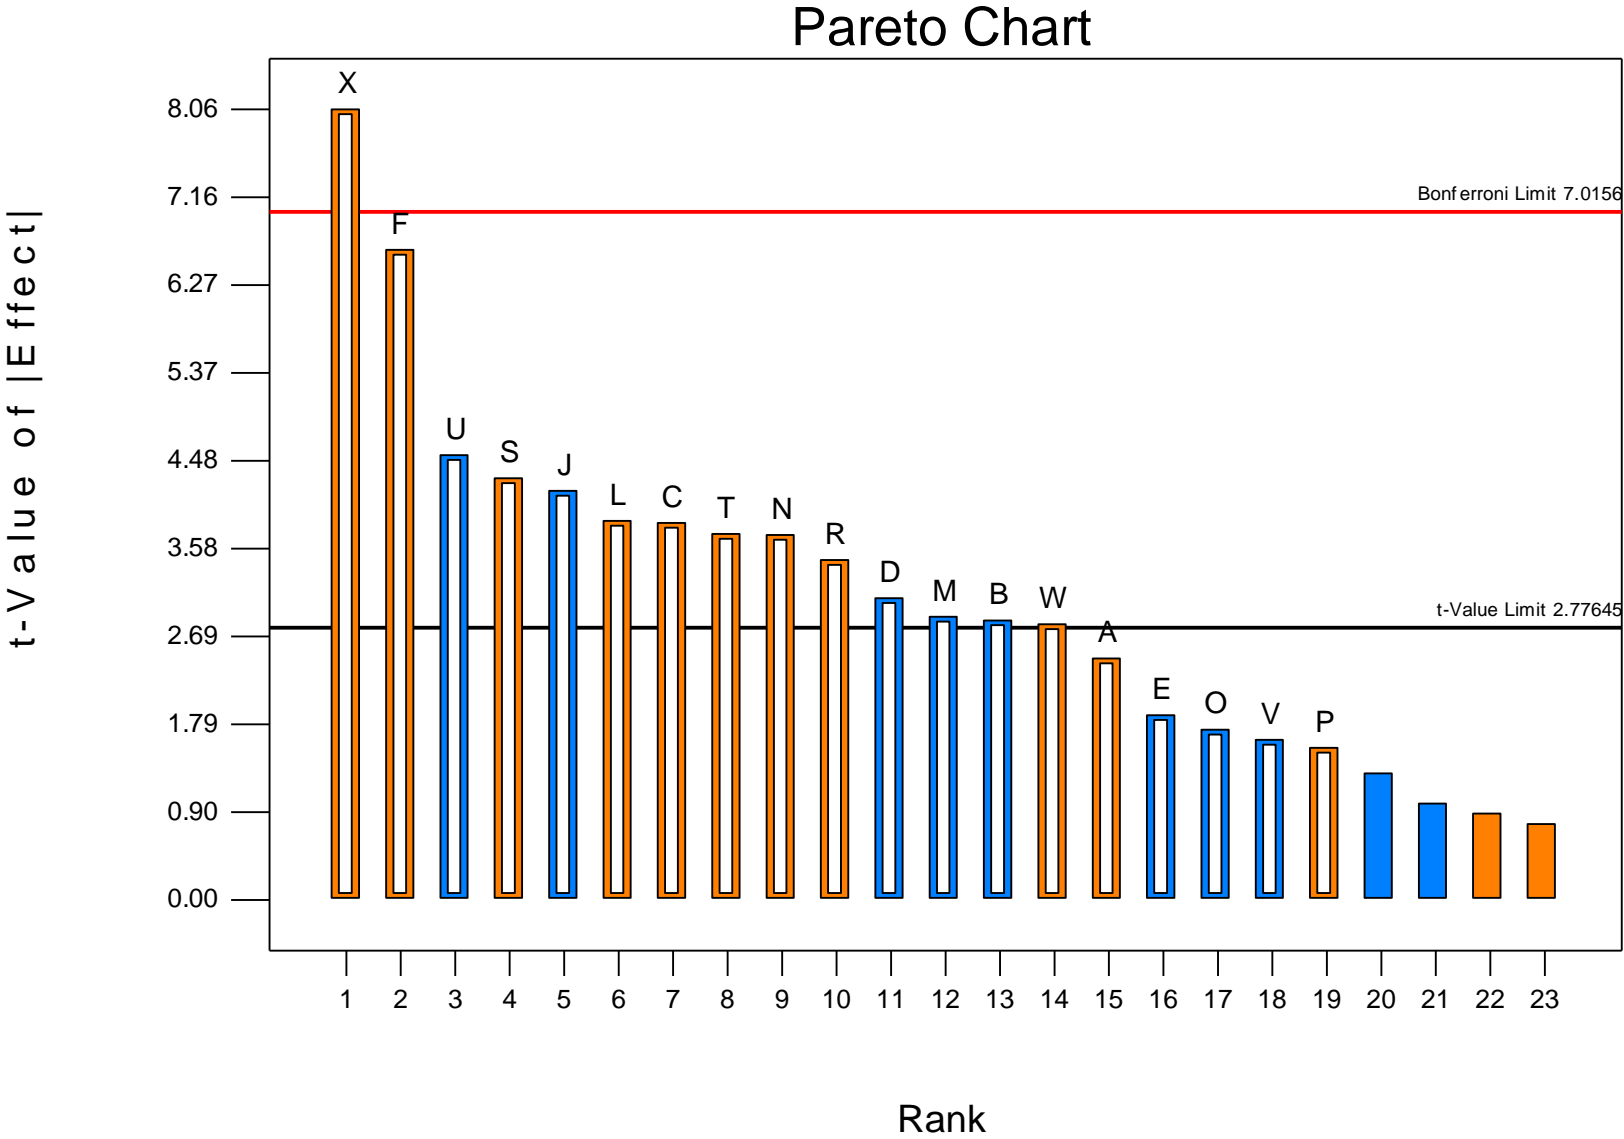

Fig S4: Pareto chart of the effects of chemical compounds predicted by flux balance analysis (FBA) on biomass production by the engineered strain Po1f-1312E+1269IB

- A: Thiamine pyrophosphate
- B: Pyridoxine, hydrochloride
- C: nicotinate
- D: Succinate
- E: 4 Aminobutyric acid
- F: KH<sub>2</sub>PO<sub>4</sub>
- G: (NH<sub>4</sub>)<sub>2</sub>SO<sub>4</sub>
- H: Urea
- J: Sulfite Na<sub>2</sub>SO<sub>3</sub>
- K: Ergosterol
- L: Ethanolamine
- M: Hypoxanthine
- N: Guanine
- O: L Histidine
- P: L Methionine
- Q: L Lysine
- R: L Tryptophan
- S: L Valine
- T: L Asparagine
- U: L isoleucine
- V: L Leucine
- W: D glucose
- X: D Fructose
- Positive Effects
- Negative Effects

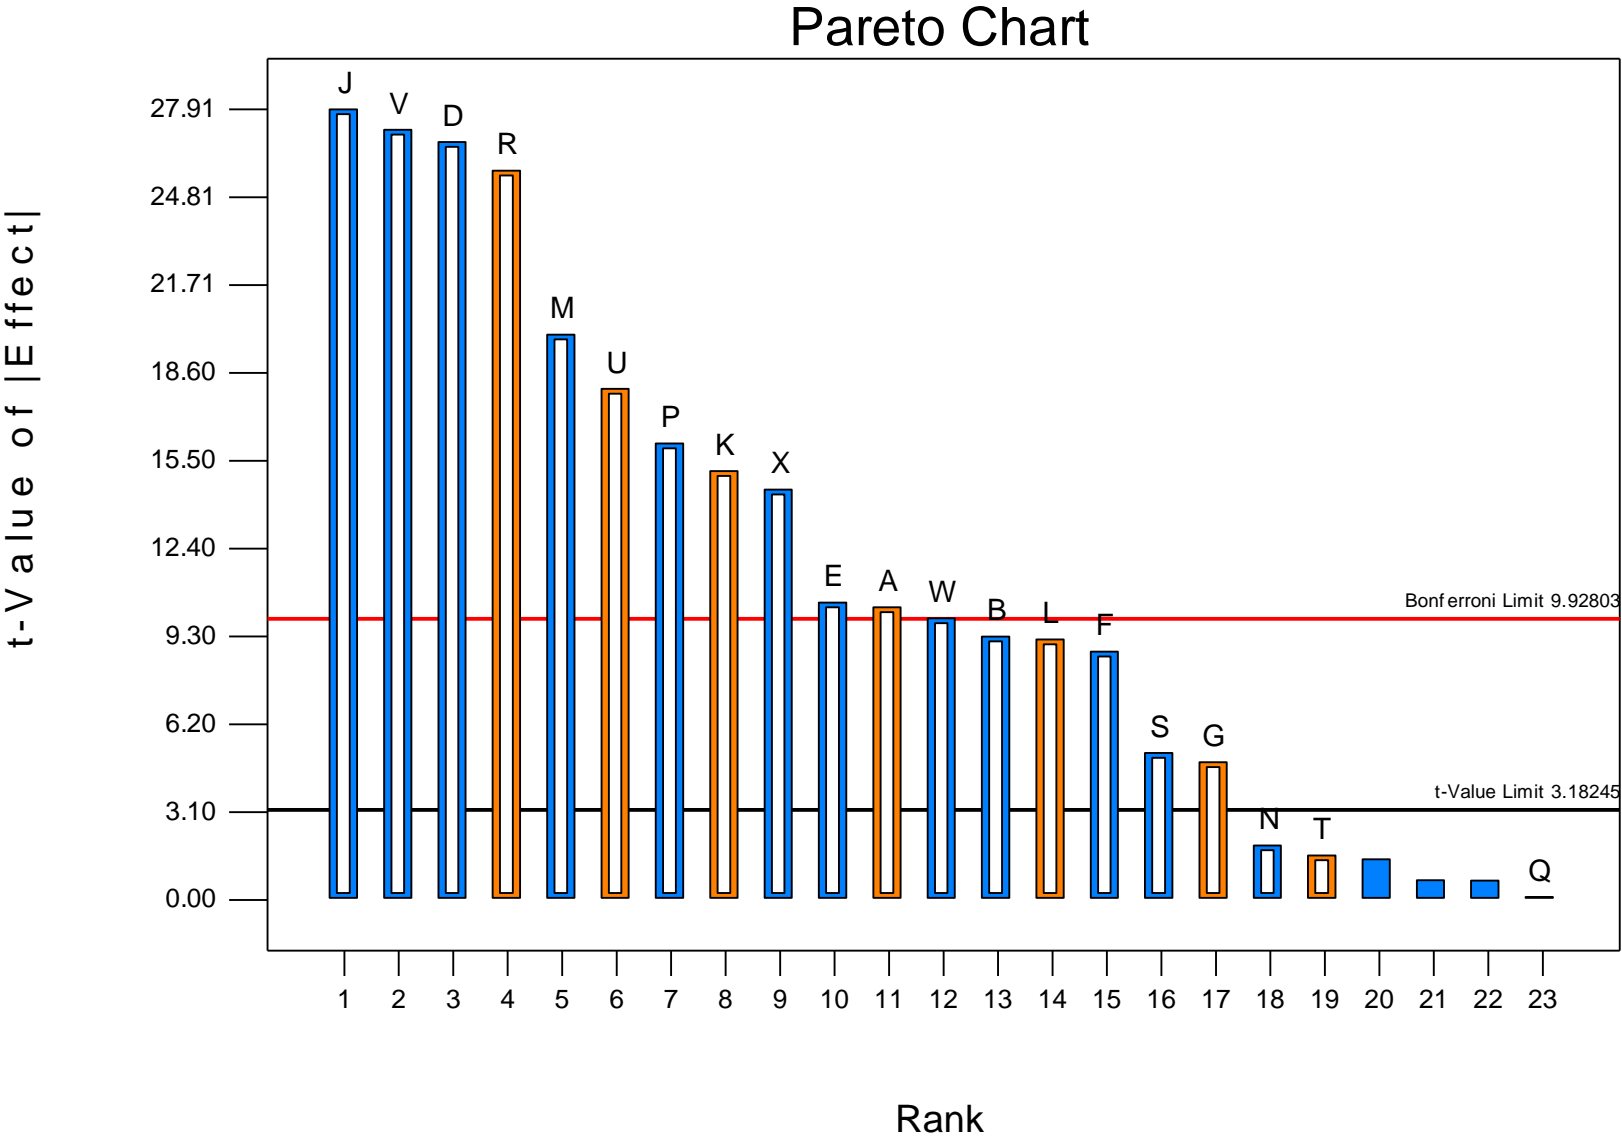

Fig S5: Pareto chart of the effects of chemical compounds predicted by flux balance analysis (FBA) on lycopene production by the engineered strain Po1f-1312E+1269IB

- A: Thiamine pyrophosphate
- B: Pyridoxine, hydrochloride
- C: nicotinate
- D: Succinate
- E: 4 Aminobutyric acid
- F: KH<sub>2</sub>PO<sub>4</sub>
- G: (NH<sub>4</sub>)<sub>2</sub>SO<sub>4</sub>
- H: Urea
- J: Sulfite Na<sub>2</sub>SO<sub>3</sub>
- K: Ergosterol
- L: Ethanolamine
- M: Hypoxanthine
- N: Guanine
- O: L Histidine
- P: L Methionine
- Q: L Lysine
- R: L Tryptophan
- S: L Valine
- T: L Asparagine
- U: L isoleucine
- V: L Leucine
- W: D glucose
- X: D Fructose
- Positive Effects
- Negative Effects

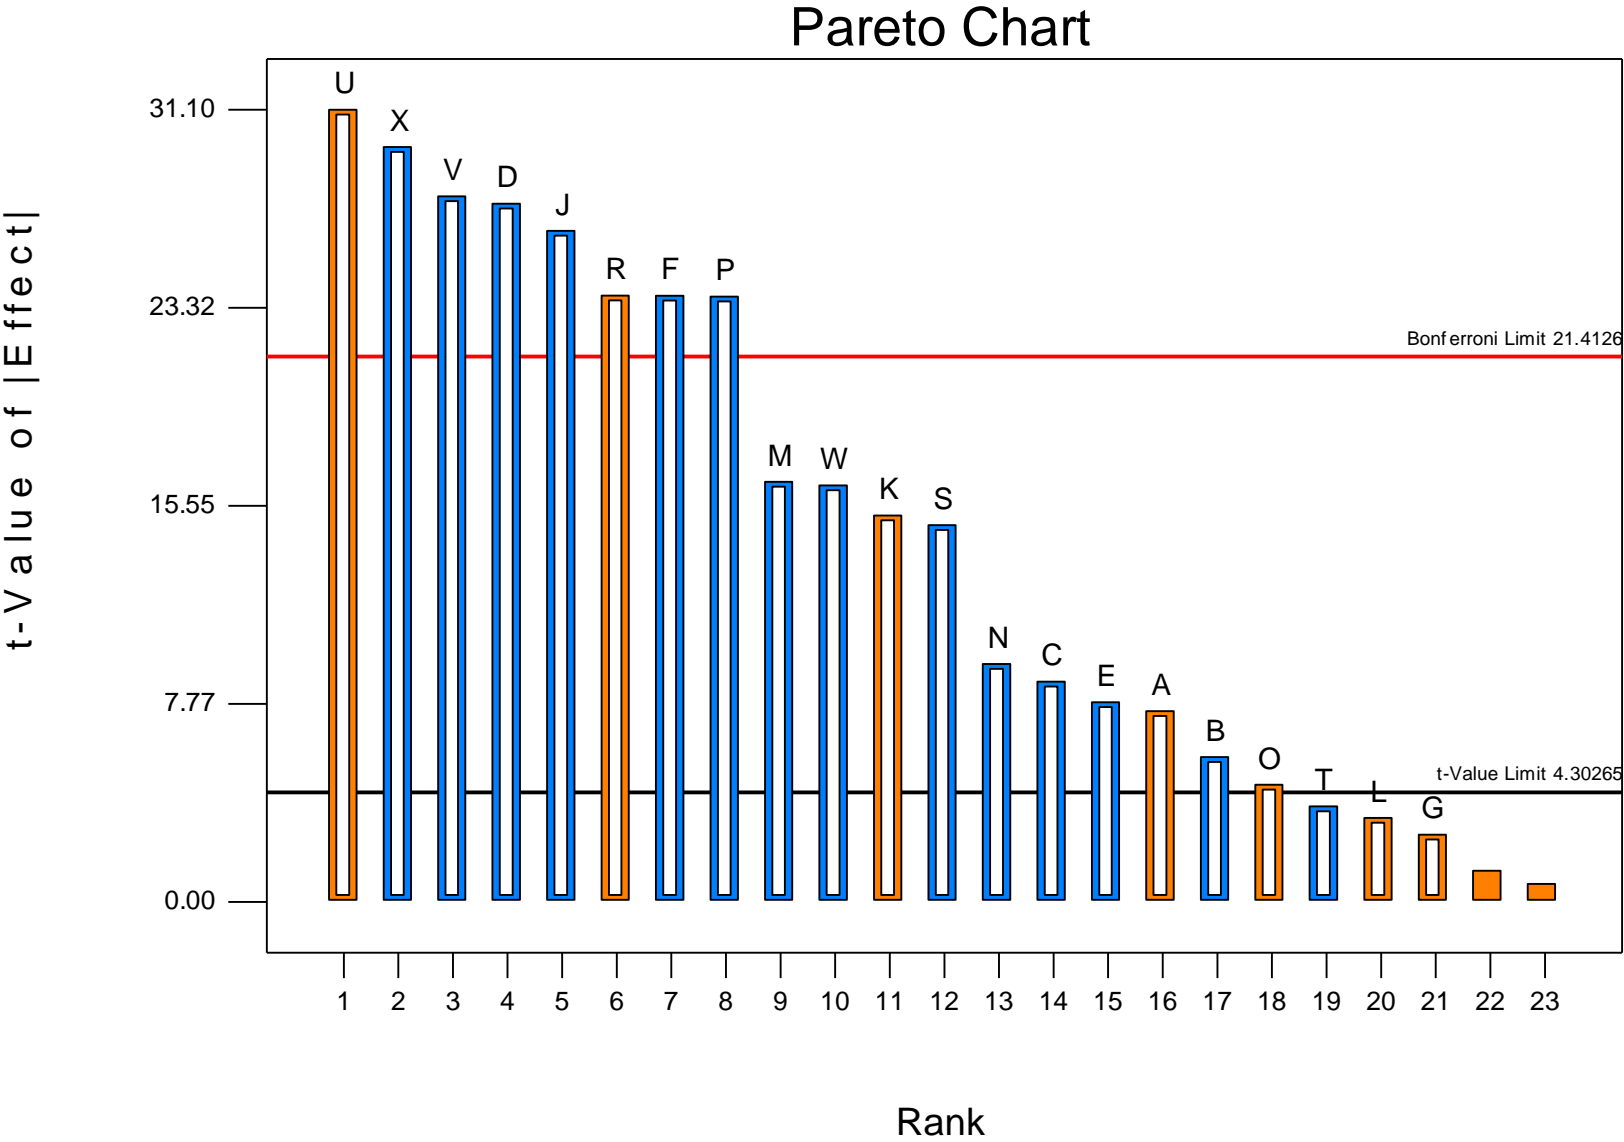

Fig S6: Pareto chart of the effects of chemical compounds predicted by flux balance analysis (FBA) on lycopene content of the engineered strain Po1f-1312E+1269IB

- A: Thiamine pyrophosphate
- B: Pyridoxine, hydrochloride
- C: nicotinate
- D: Succinate
- E: 4 Aminobutyric acid
- F: KH<sub>2</sub>PO<sub>4</sub>
- G: (NH<sub>4</sub>)<sub>2</sub>SO<sub>4</sub>
- H: Urea
- J: Sulfite Na<sub>2</sub>SO<sub>3</sub>
- K: Ergosterol
- L: Ethanolamine
- M: Hypoxanthine
- N: Guanine
- O: L Histidine
- P: L Methionine
- Q: L Lysine
- R: L Tryptophan
- S: L Valine
- T: L Asparagine
- U: L isoleucine
- V: L Leucine
- W: D glucose
- X: D Fructose
- Positive Effects
- Negative Effects

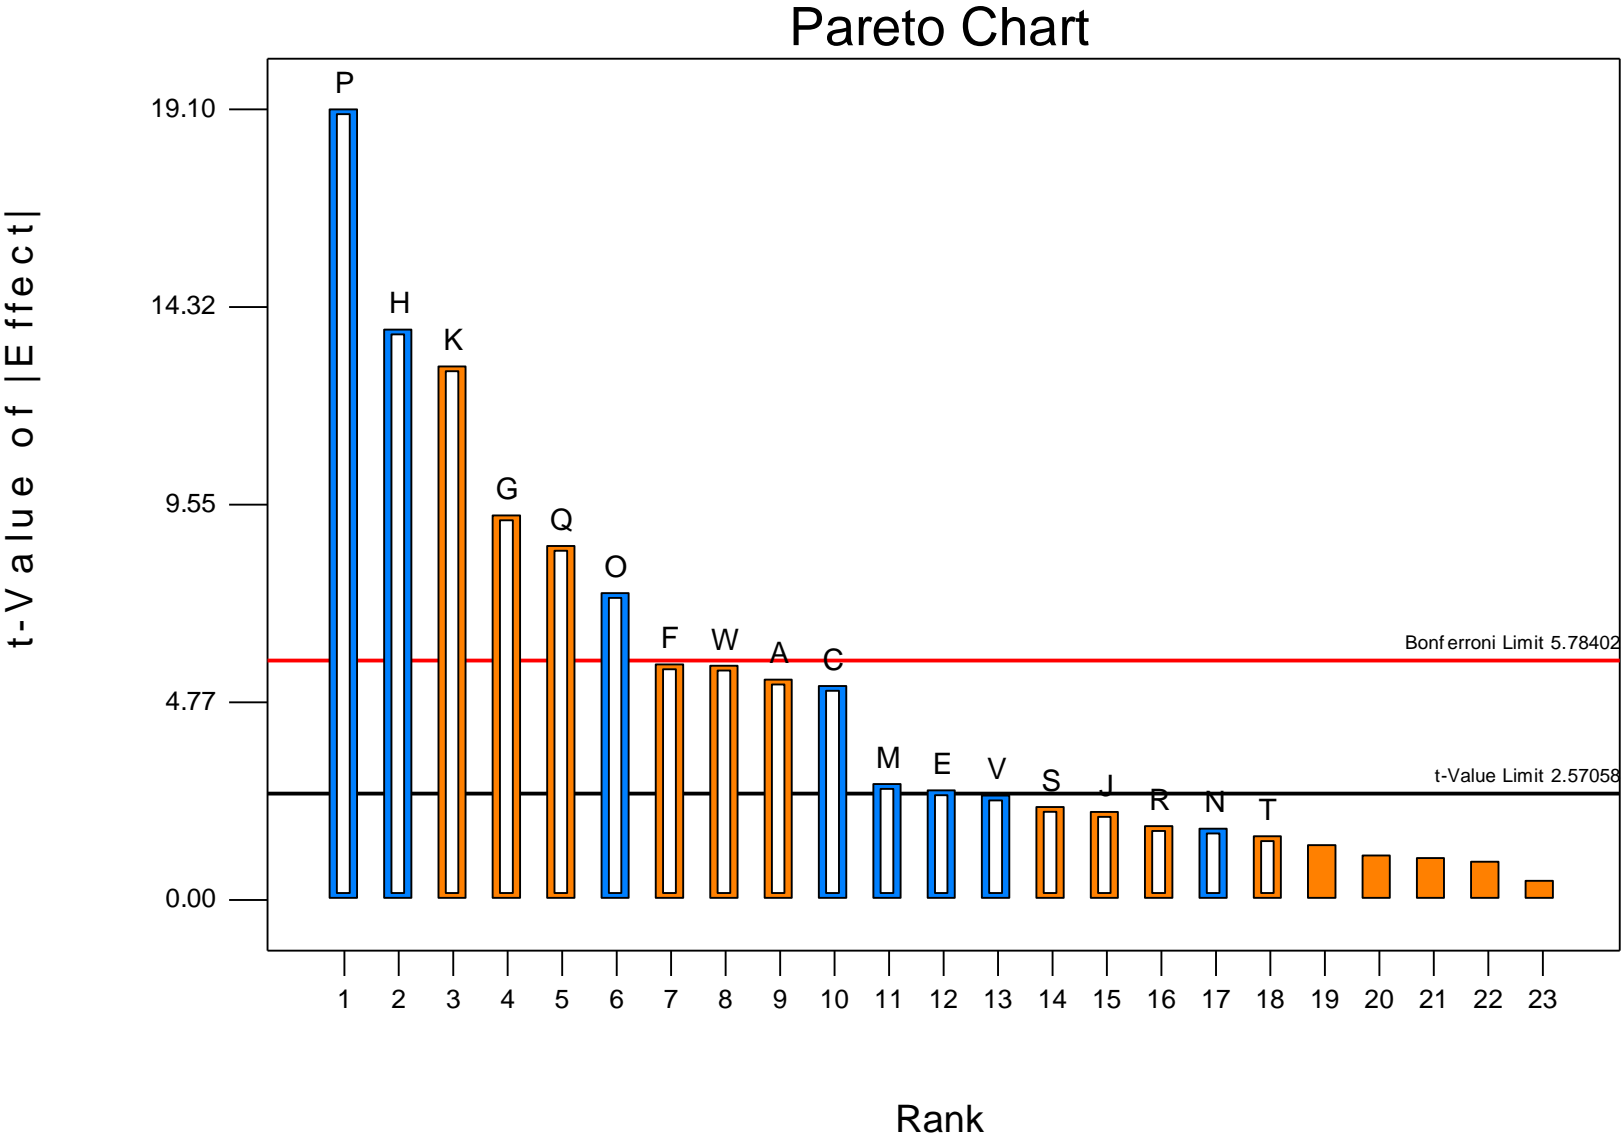

Fig S7: Pareto chart of the effects of chemical compounds predicted by flux balance analysis (FBA) on lipid production by the engineered strain Po1f-1312E+1269IB

- A: Thiamine pyrophosphate
- B: Pyridoxine, hydrochloride
- C: nicotinate
- D: Succinate
- E: 4 Aminobutyric acid
- F: KH<sub>2</sub>PO<sub>4</sub>
- G: (NH<sub>4</sub>)<sub>2</sub>SO<sub>4</sub>
- H: Urea
- J: Sulfite Na<sub>2</sub>SO<sub>3</sub>
- K: Ergosterol
- L: Ethanolamine
- M: Hypoxanthine
- N: Guanine
- O: L Histidine
- P: L Methionine
- Q: L Lysine
- R: L Tryptophan
- S: L Valine
- T: L Asparagine
- U: L isoleucine
- V: L Leucine
- W: D glucose
- X: D Fructose
- Positive Effects
- Negative Effects

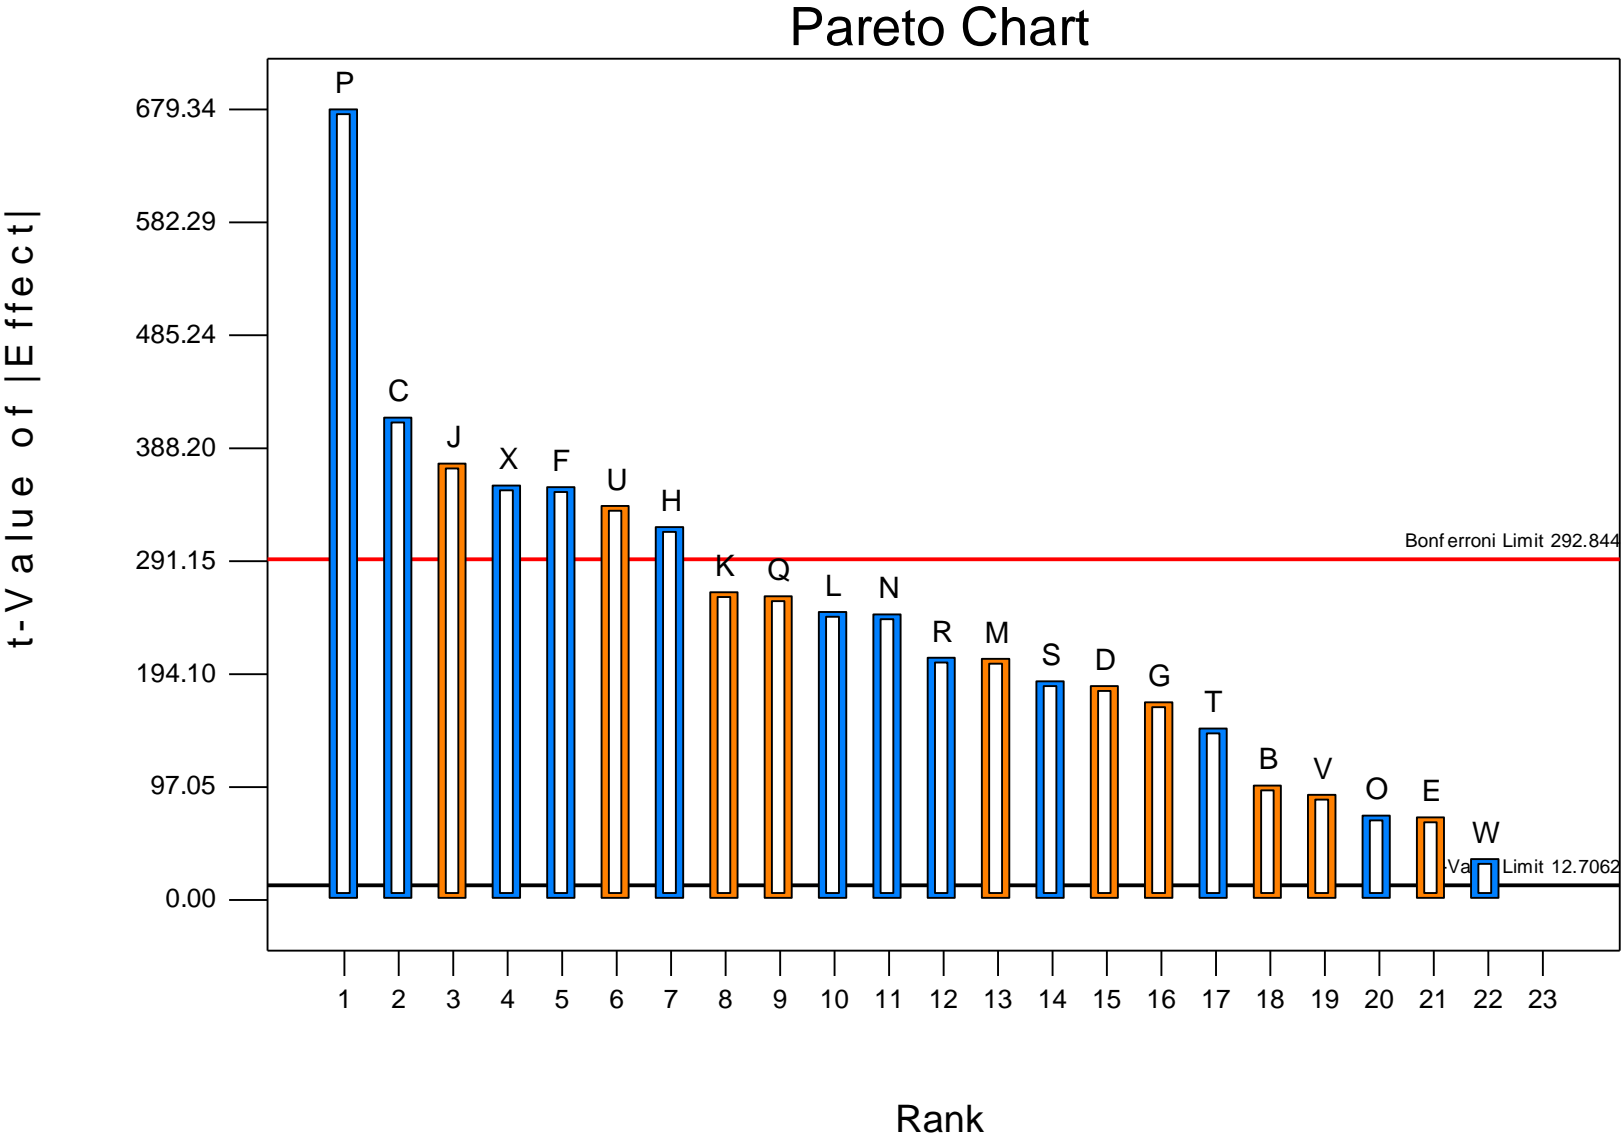

Fig S8: Pareto chart of the effects of chemical compounds predicted by flux balance analysis (FBA) on lipid content of the engineered strain Po1f-1312E+1269IB



- A: KH<sub>2</sub>PO<sub>4</sub>
  - B: (NH<sub>4</sub>)<sub>2</sub>SO<sub>4</sub>
  - C: L Lysine
  - D: L Tryptophan
  - E: Ergosterol
  - F: Ethanolamine
  - G: L Asparagine
  - H: L isoleucine
  - J: D glucose
  - K: D Fructose
  - L: Thiamine
- Positive Effects  
■ Negative Effects

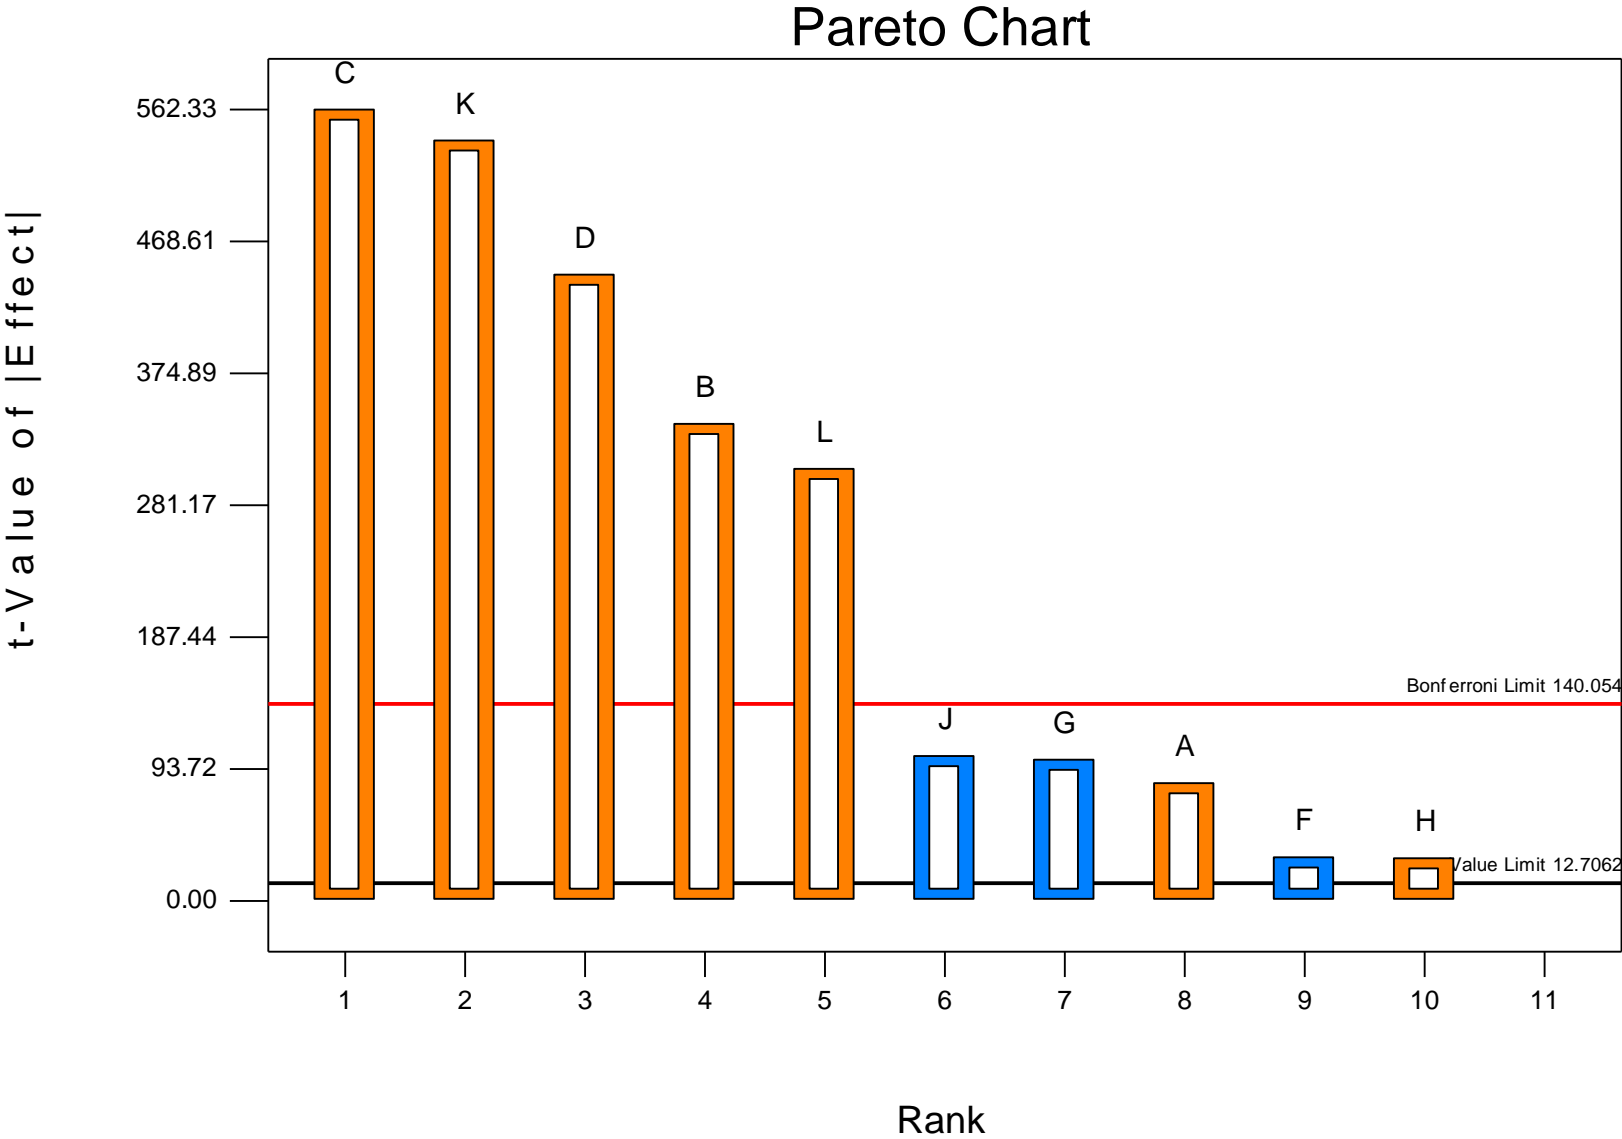

Fig S9: Pareto chart of the effects of chemical compounds predicted by flux balance analysis (FBA) on Biomass production by the engineered strain Po1f-1312E+1269IB in the second tour PBD

- A: KH<sub>2</sub>PO<sub>4</sub>
  - B: (NH<sub>4</sub>)<sub>2</sub>SO<sub>4</sub>
  - C: L Lysine
  - D: L Tryptophan
  - E: Ergosterol
  - F: Ethanolamine
  - G: L Asparagine
  - H: L isoleucine
  - J: D glucose
  - K: D Fructose
  - L: Thiamine
- Positive Effects  
■ Negative Effects

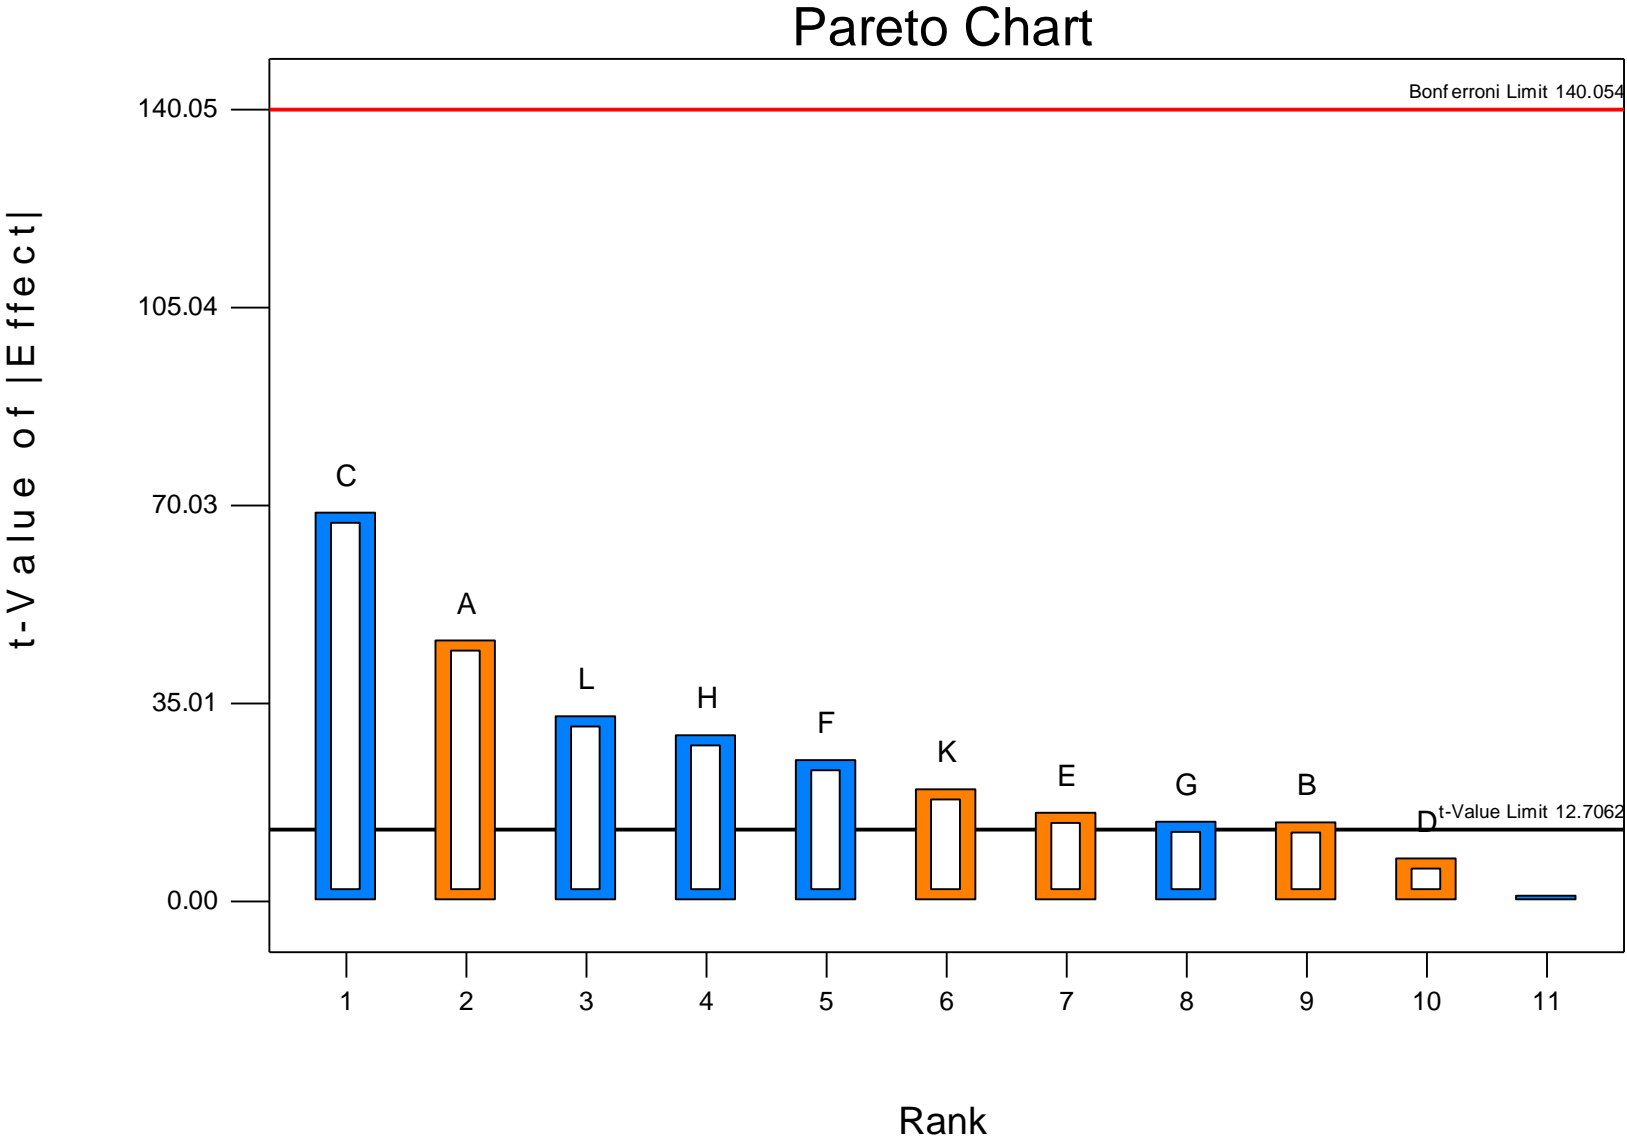

Fig S10: Pareto chart of the effects of chemical compounds predicted by flux balance analysis (FBA) on lycopene production of the engineered strain Po1f-1312E+1269IB in the second tour PBD

- A: KH<sub>2</sub>PO<sub>4</sub>
- B: (NH<sub>4</sub>)<sub>2</sub>SO<sub>4</sub>
- C: L Lysine
- D: L Tryptophan
- E: Ergosterol
- F: Ethanolamine
- G: L Asparagine
- H: L isoleucine
- J: D glucose
- K: D Fructose
- L: Thiamine
- Positive Effects
- Negative Effects

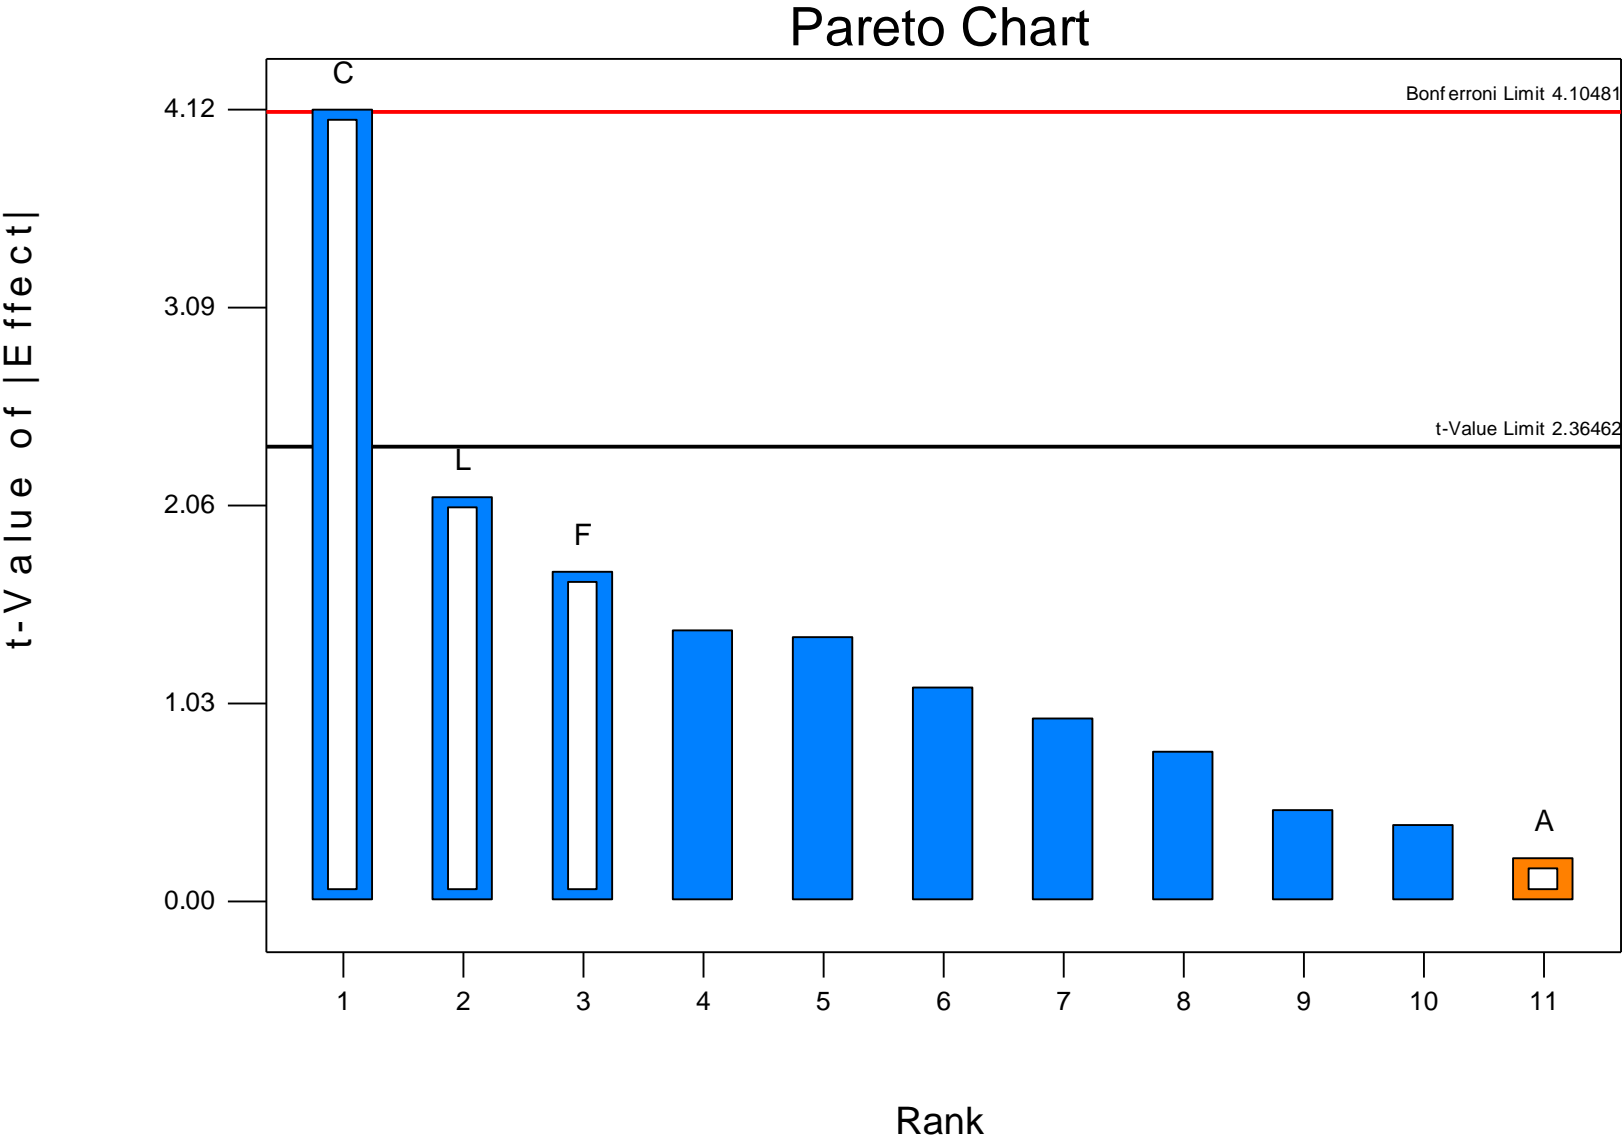

Fig S11: Pareto chart of the effects of chemical compounds predicted by flux balance analysis (FBA) on lycopene content of the engineered strain Po1f-1312E+1269IB in the second tour PBD

- A: KH<sub>2</sub>PO<sub>4</sub>
  - B: (NH<sub>4</sub>)<sub>2</sub>SO<sub>4</sub>
  - C: L Lysine
  - D: L Tryptophan
  - E: Ergosterol
  - F: Ethanolamine
  - G: L Asparagine
  - H: L isoleucine
  - J: D glucose
  - K: D Fructose
  - L: Thiamine
- Positive Effects  
■ Negative Effects

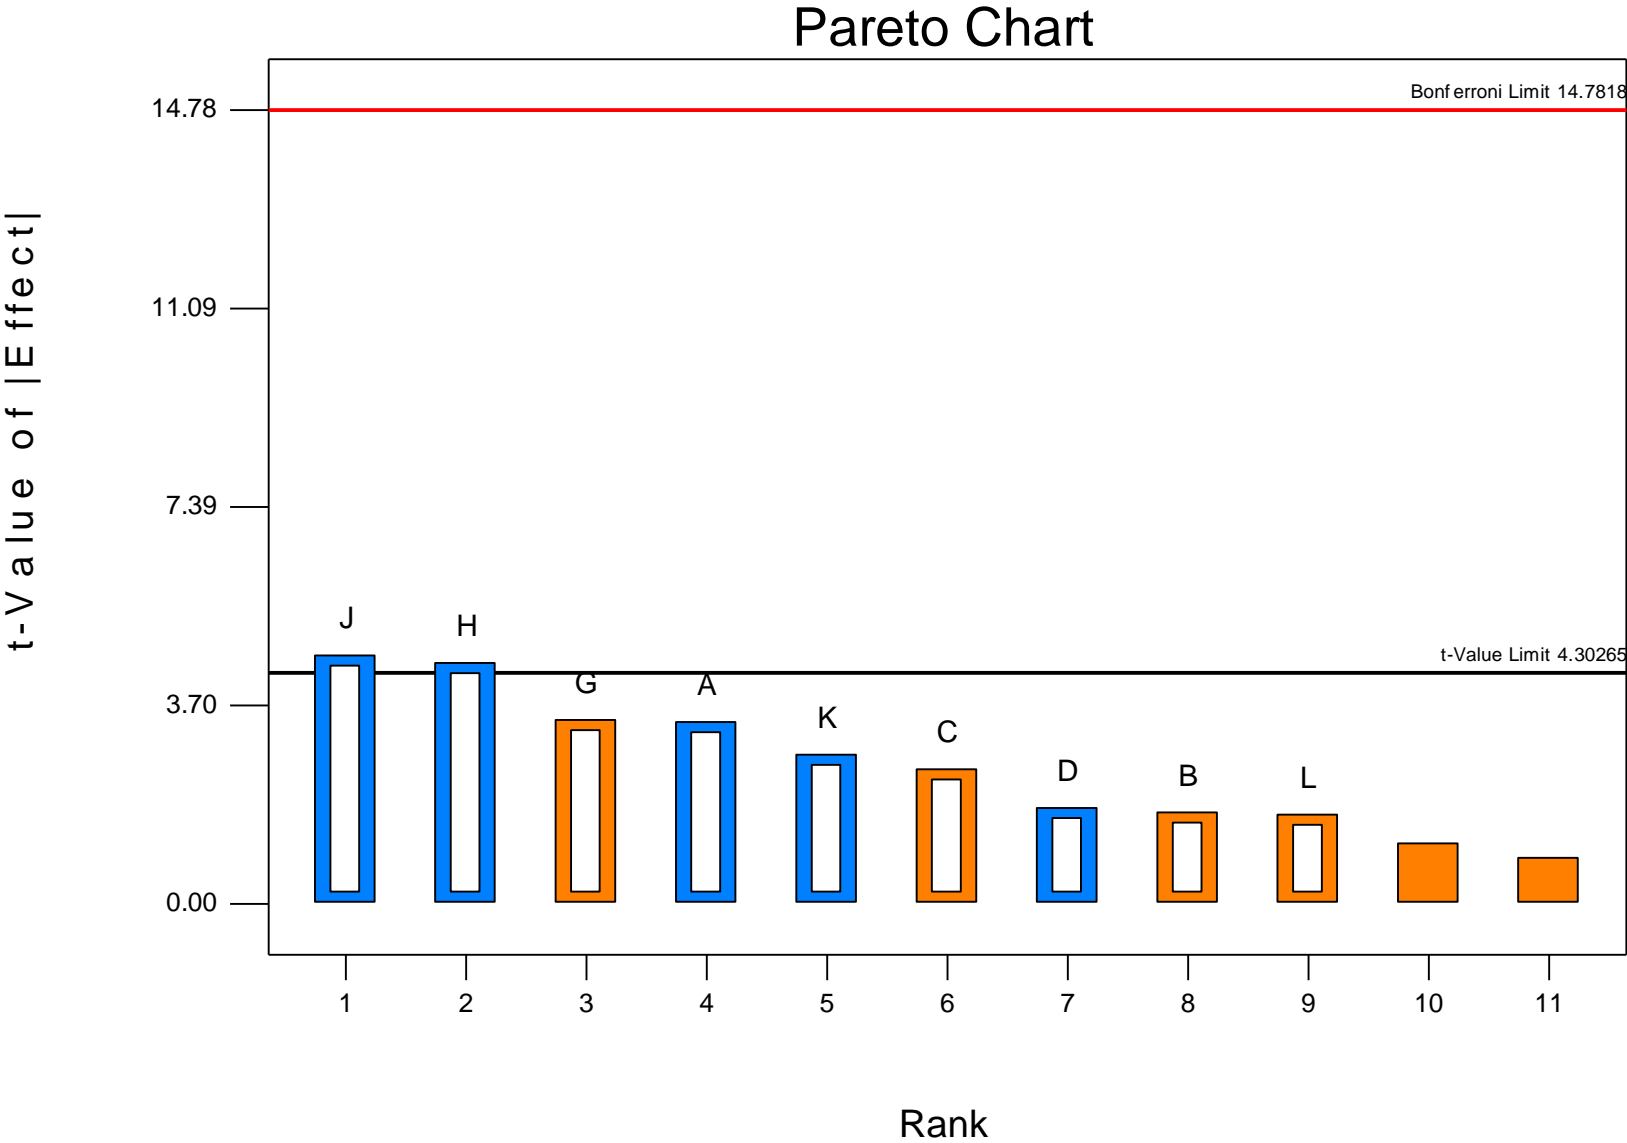

Fig S12: Pareto chart of the effects of chemical compounds predicted by flux balance analysis (FBA) on the expression level of YALI0B08536g in the engineered strain Po1f-1312E+1269IB in the second tour PBD

- A: KH2PO4
  - B: (NH4)2SO4
  - C: L Lysine
  - D: L Tryptophan
  - E: Ergosterol
  - F: Ethanolamine
  - G: L Asparagine
  - H: L isoleucine
  - J: D glucose
  - K: D Fructose
  - L: Thiamine
- Positive Effects  
■ Negative Effects

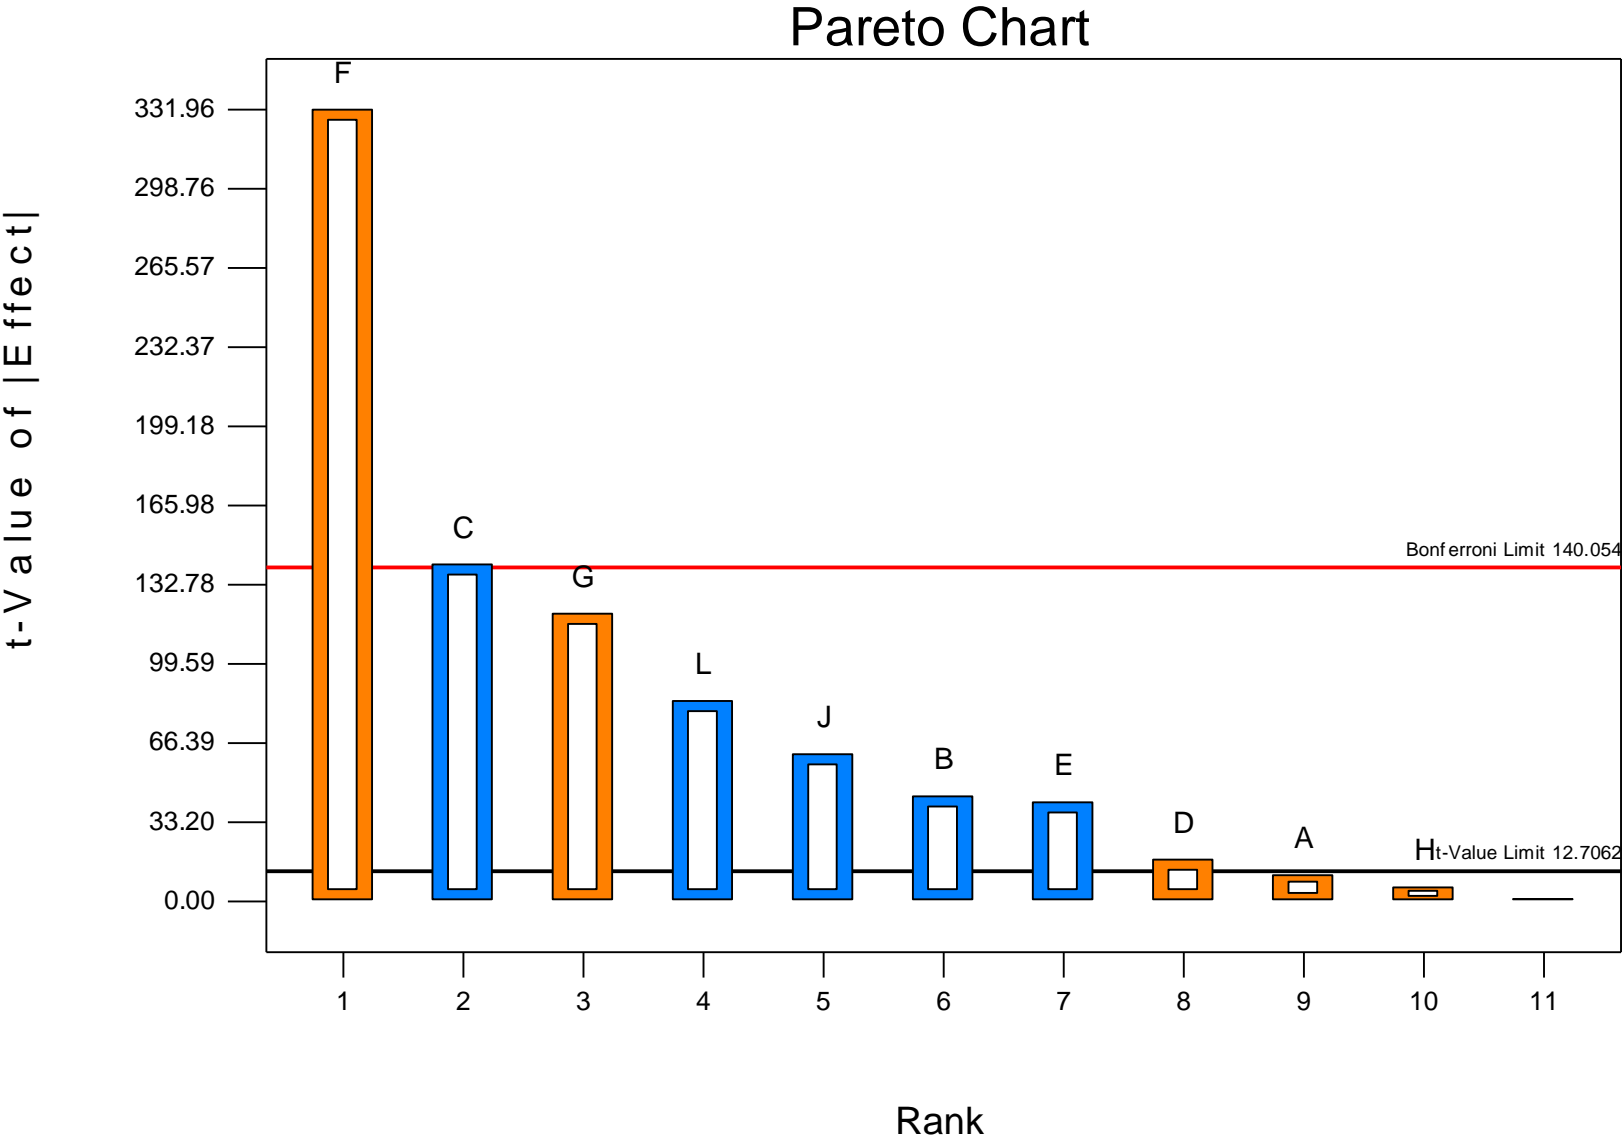

Fig S13: Pareto chart of the effects of chemical compounds predicted by flux balance analysis (FBA) on the expression level of YALI0B16038g in the engineered strain Po1f-1312E+1269IB in the second tour PBD

- A: KH<sub>2</sub>PO<sub>4</sub>
  - B: (NH<sub>4</sub>)<sub>2</sub>SO<sub>4</sub>
  - C: L Lysine
  - D: L Tryptophan
  - E: Ergosterol
  - F: Ethanolamine
  - G: L Asparagine
  - H: L isoleucine
  - J: D glucose
  - K: D Fructose
  - L: Thiamine
- Positive Effects
- Negative Effects

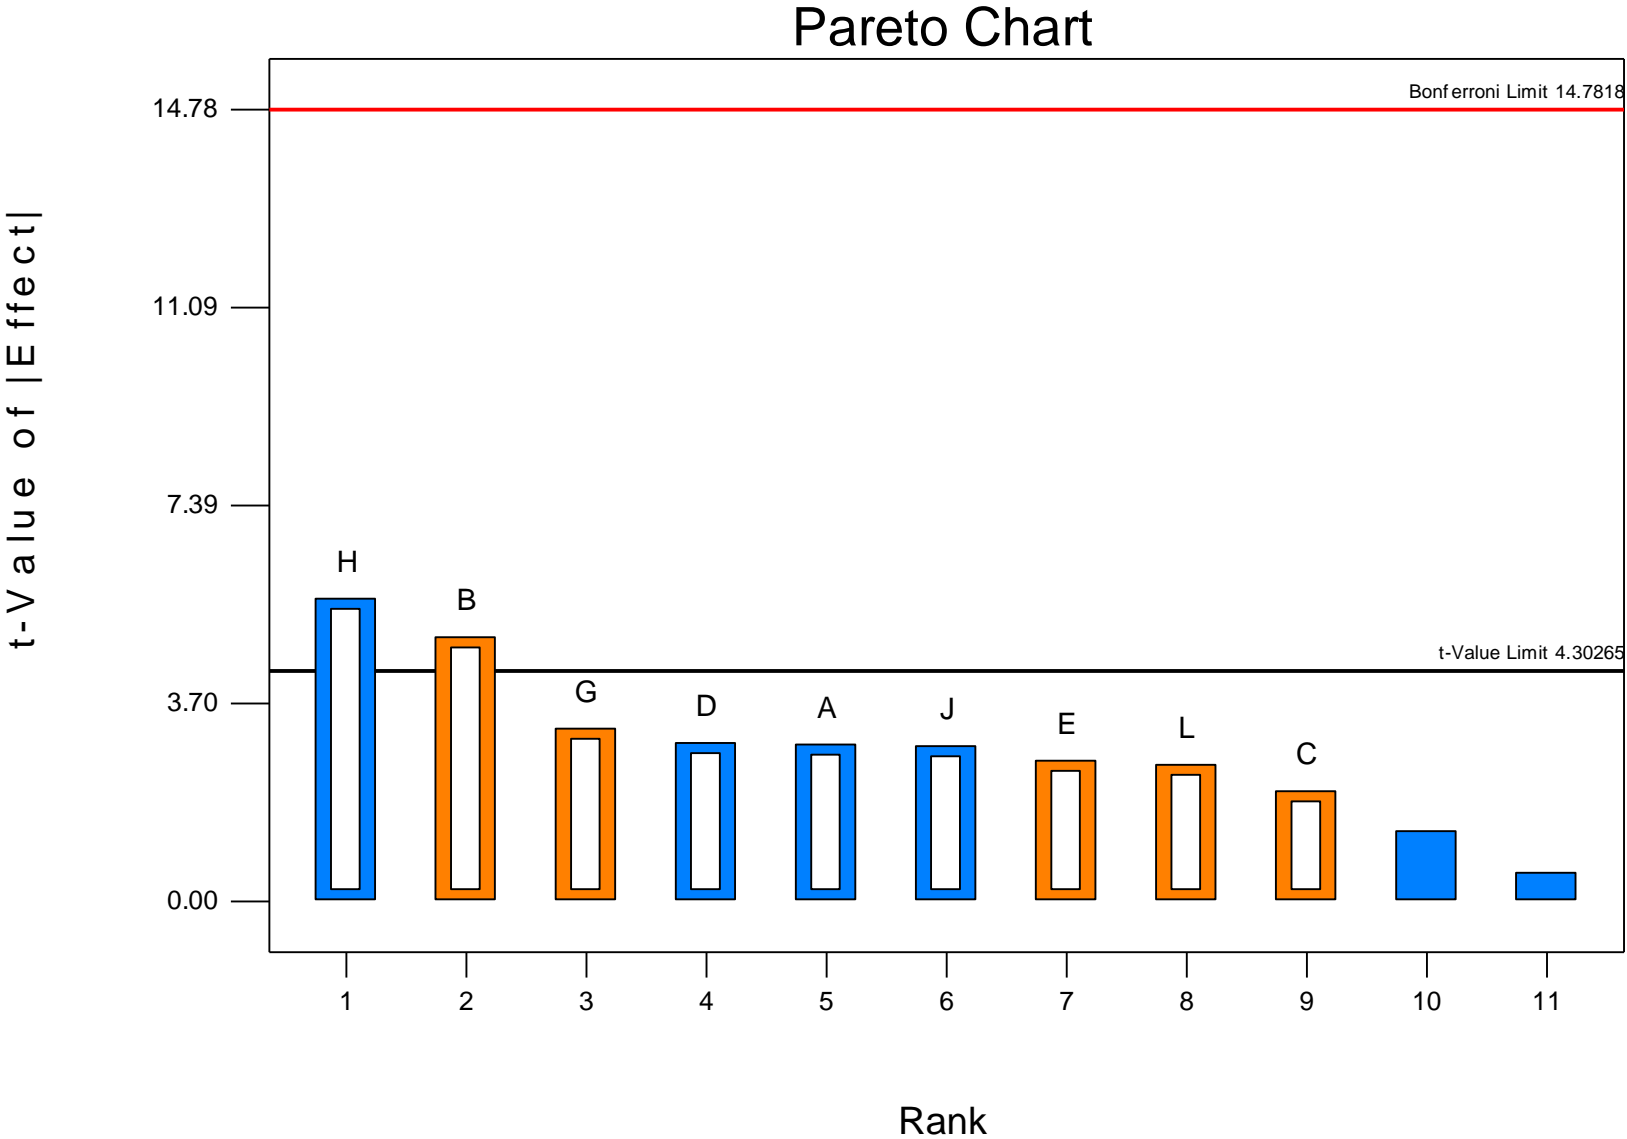

Fig S14: Pareto chart of the effects of chemical compounds predicted by flux balance analysis (FBA) on the expression level of YALI0B16126g in the engineered strain Po1f-1312E+1269IB in the second tour PBD

A: KH<sub>2</sub>PO<sub>4</sub>  
B: (NH<sub>4</sub>)<sub>2</sub>SO<sub>4</sub>  
C: L Lysine  
D: L Tryptophan  
E: Ergosterol  
F: Ethanolamine  
G: L Asparagine  
H: L isoleucine  
J: D glucose  
K: D Fructose  
L: Thiamine  
■ Positive Effects  
■ Negative Effects

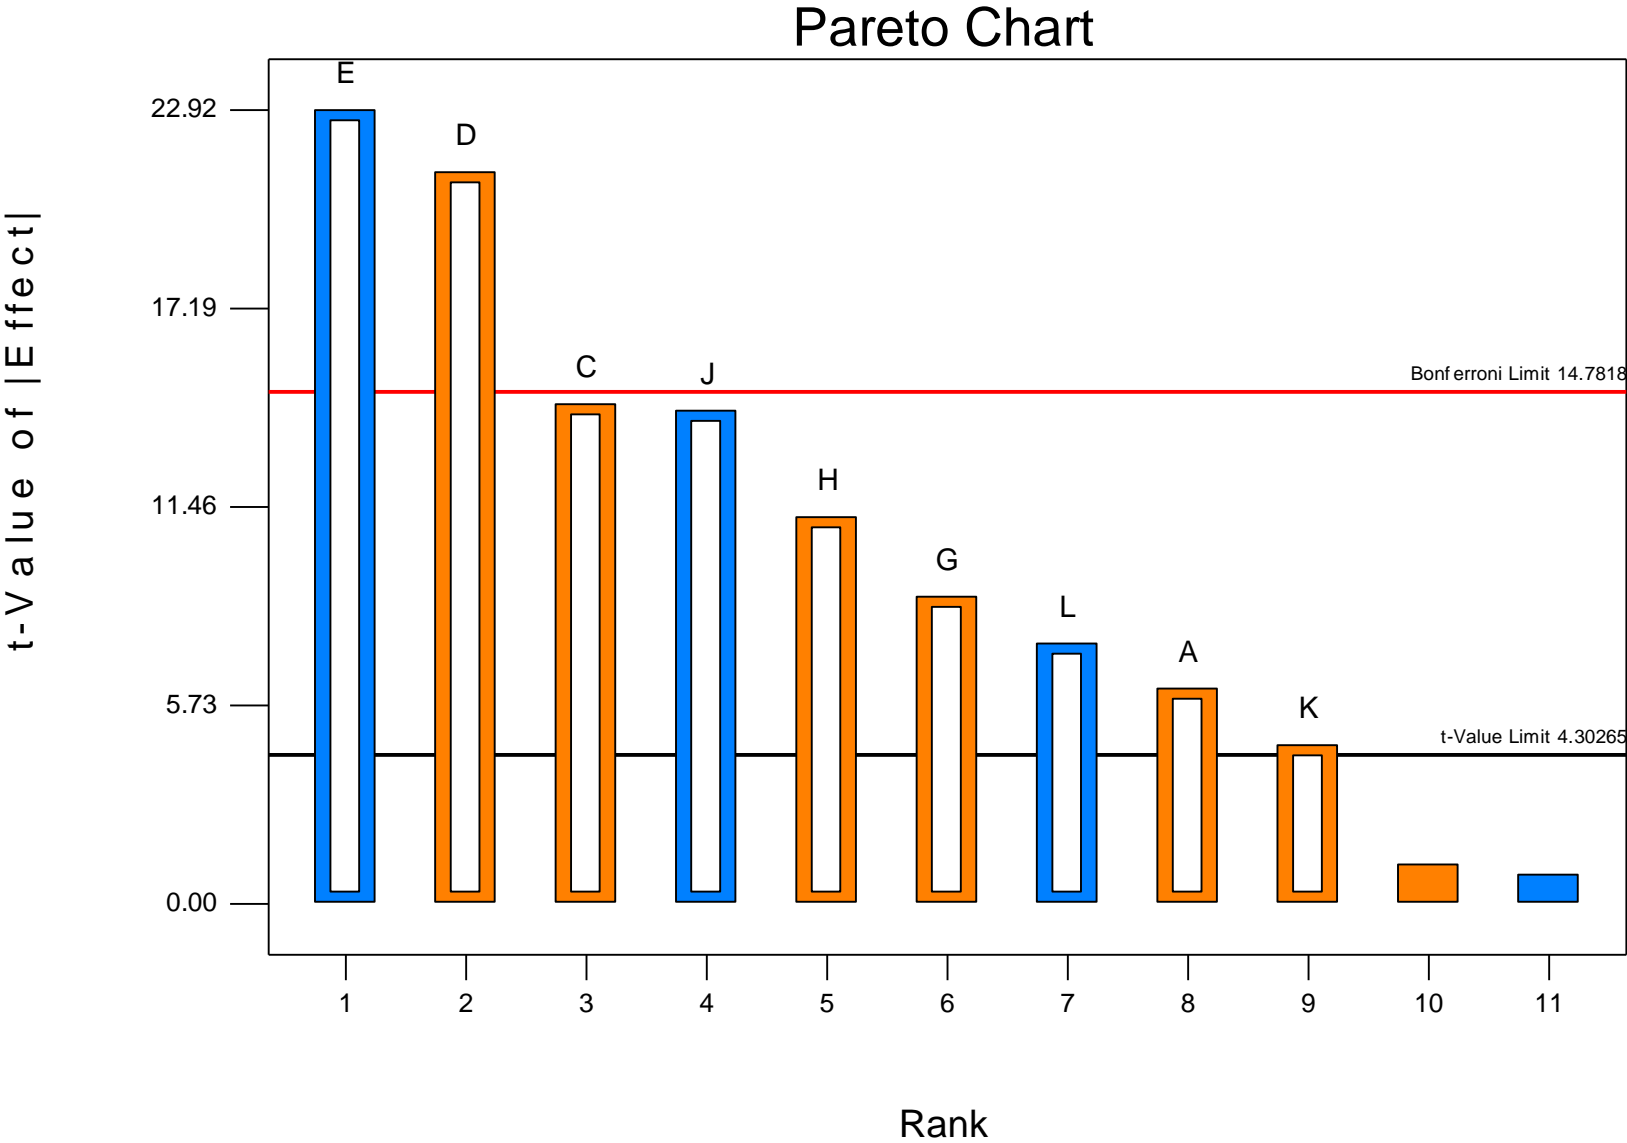

Fig S15: Pareto chart of the effects of chemical compounds predicted by flux balance analysis (FBA) on the expression level of YALI0C18755g in the engineered strain Po1f-1312E+1269IB in the second tour PBD

- A: KH<sub>2</sub>PO<sub>4</sub>
- B: (NH<sub>4</sub>)<sub>2</sub>SO<sub>4</sub>
- C: L Lysine
- D: L Tryptophan
- E: Ergosterol
- F: Ethanolamine
- G: L Asparagine
- H: L isoleucine
- J: D glucose
- K: D Fructose
- L: Thiamine
- Positive Effects
- Negative Effects

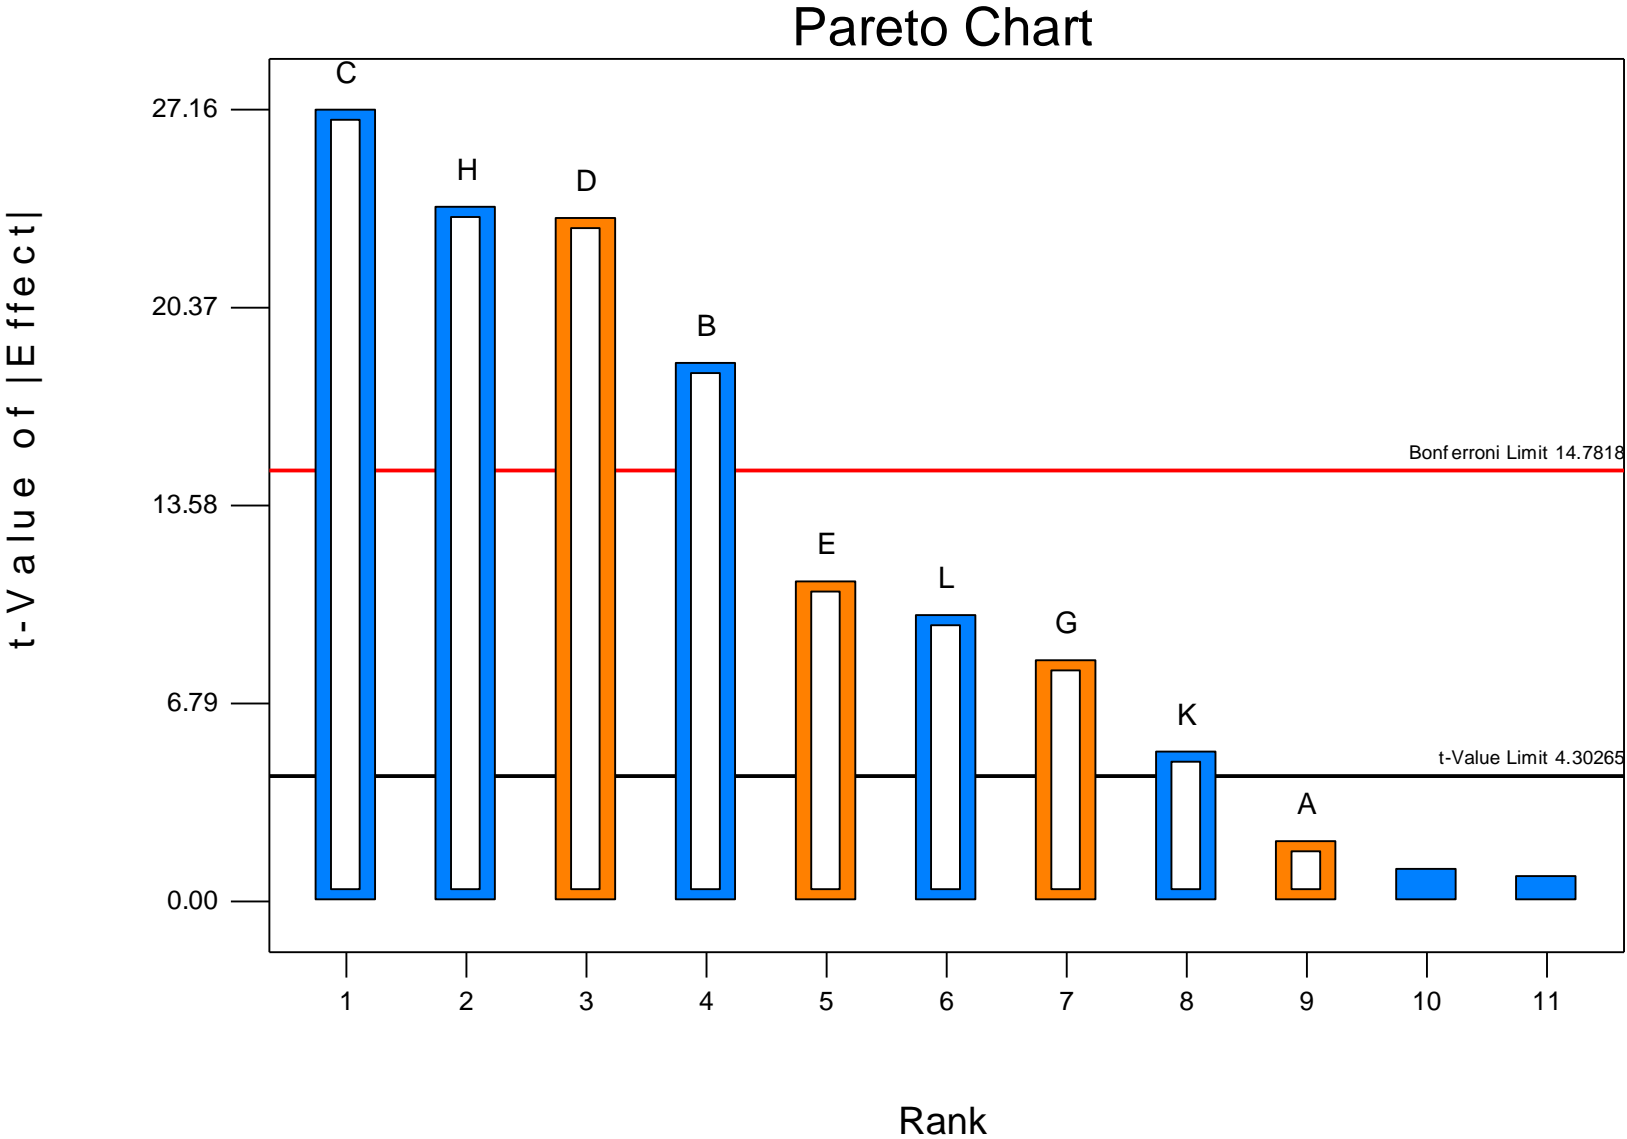

Fig S16: Pareto chart of the effects of chemical compounds predicted by flux balance analysis (FBA) on the expression level of YALI0C18799g in the engineered strain Po1f-1312E+1269IB in the second tour PBD



- A: KH<sub>2</sub>PO<sub>4</sub>
  - B: (NH<sub>4</sub>)<sub>2</sub>SO<sub>4</sub>
  - C: L Lysine
  - D: L Tryptophan
  - E: Ergosterol
  - F: Ethanolamine
  - G: L Asparagine
  - H: L isoleucine
  - J: D glucose
  - K: D Fructose
  - L: Thiamine
- Positive Effects  
■ Negative Effects

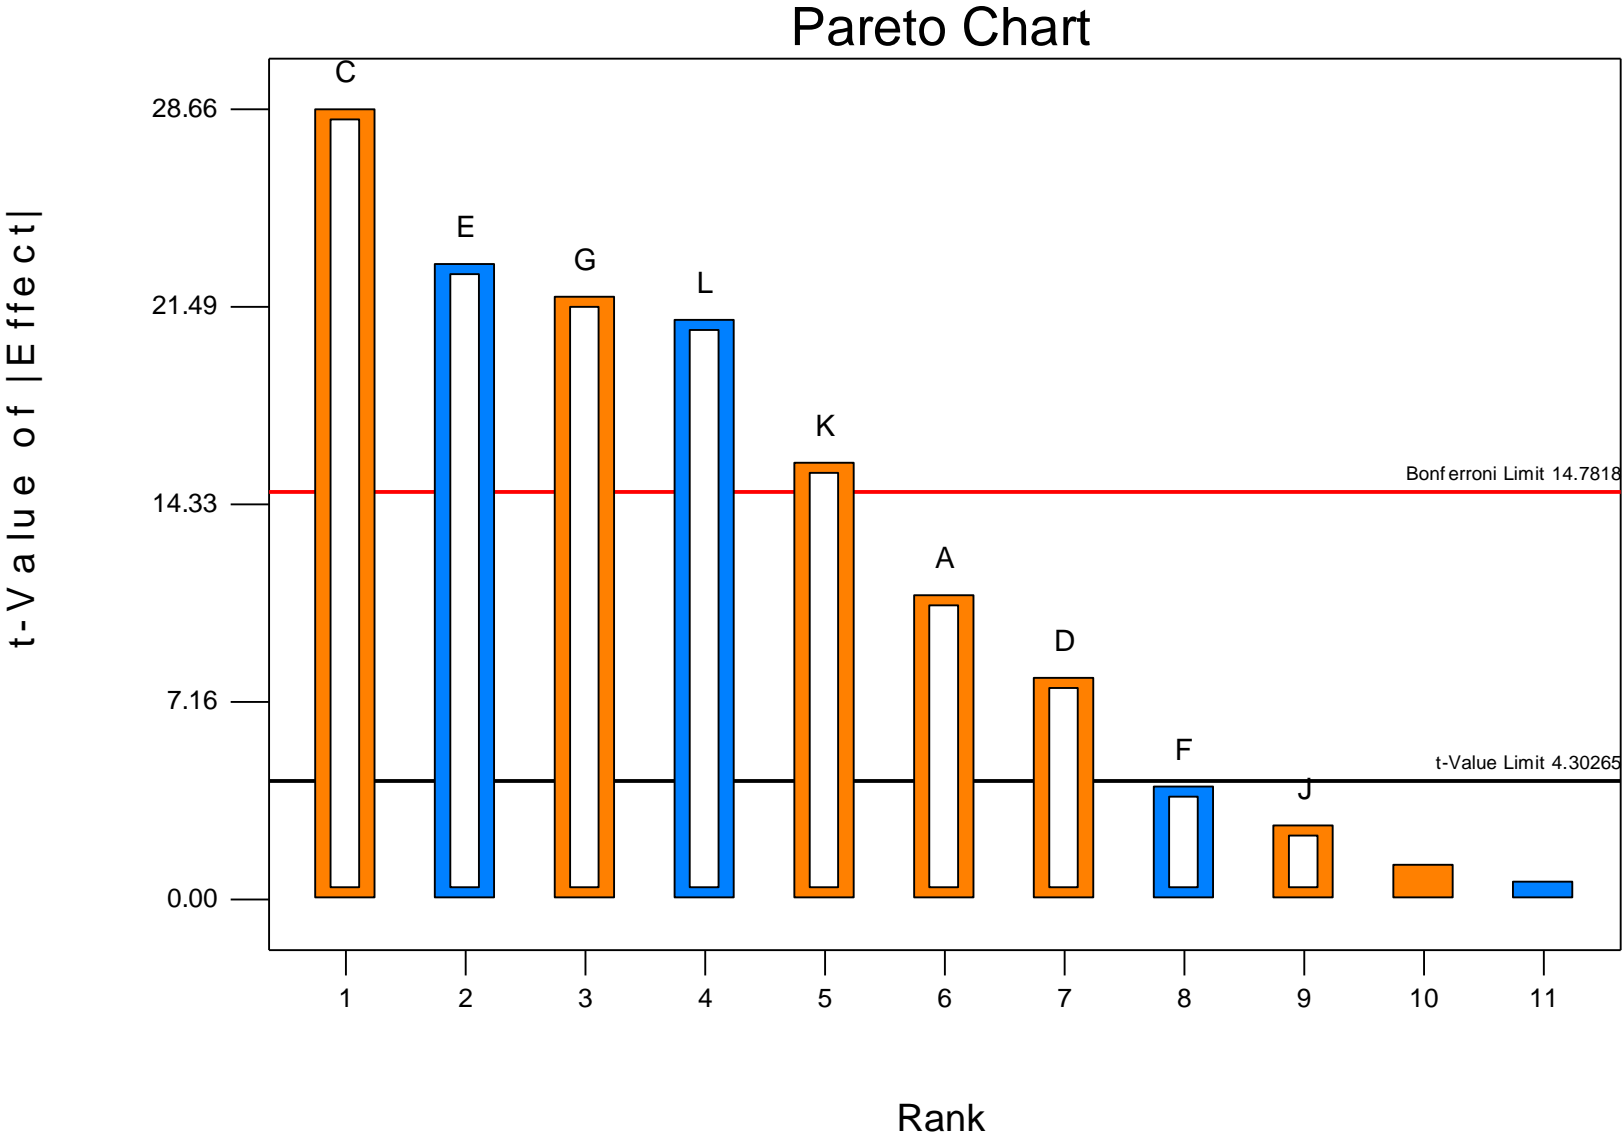

Fig S17: Pareto chart of the effects of chemical compounds predicted by flux balance analysis (FBA) on the expression level of YALI0D14762g in the engineered strain Po1f-1312E+1269IB in the second tour PBD

- A: KH<sub>2</sub>PO<sub>4</sub>
- B: (NH<sub>4</sub>)<sub>2</sub>SO<sub>4</sub>
- C: L Lysine
- D: L Tryptophan
- E: Ergosterol
- F: Ethanolamine
- G: L Asparagine
- H: L isoleucine
- J: D glucose
- K: D Fructose
- L: Thiamine
- Positive Effects
- Negative Effects

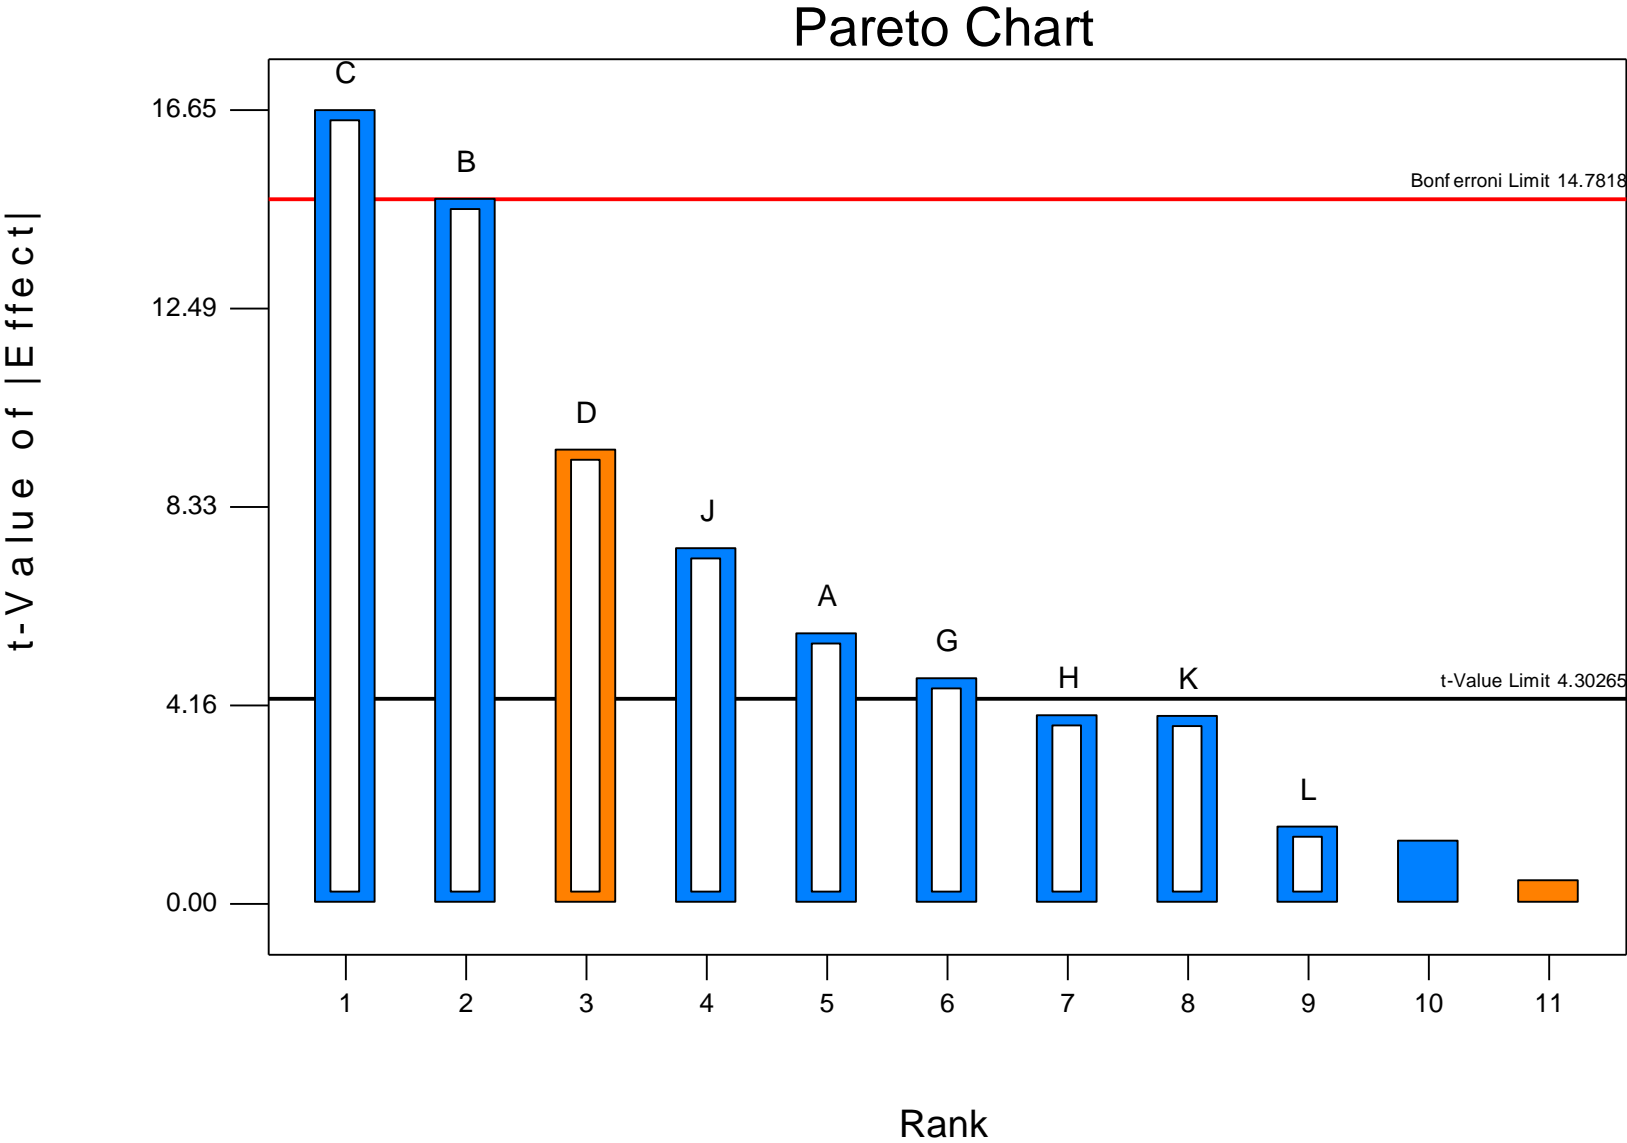

Fig S18: Pareto chart of the effects of chemical compounds predicted by flux balance analysis (FBA) on the expression level of YALI0D17050g in the engineered strain Po1f-1312E+1269IB in the second tour PBD

A: KH<sub>2</sub>PO<sub>4</sub>  
B: (NH<sub>4</sub>)<sub>2</sub>SO<sub>4</sub>  
C: L Lysine  
D: L Tryptophan  
E: Ergosterol  
F: Ethanolamine  
G: L Asparagine  
H: L isoleucine  
J: D glucose  
K: D Fructose  
L: Thiamine  
■ Positive Effects  
■ Negative Effects

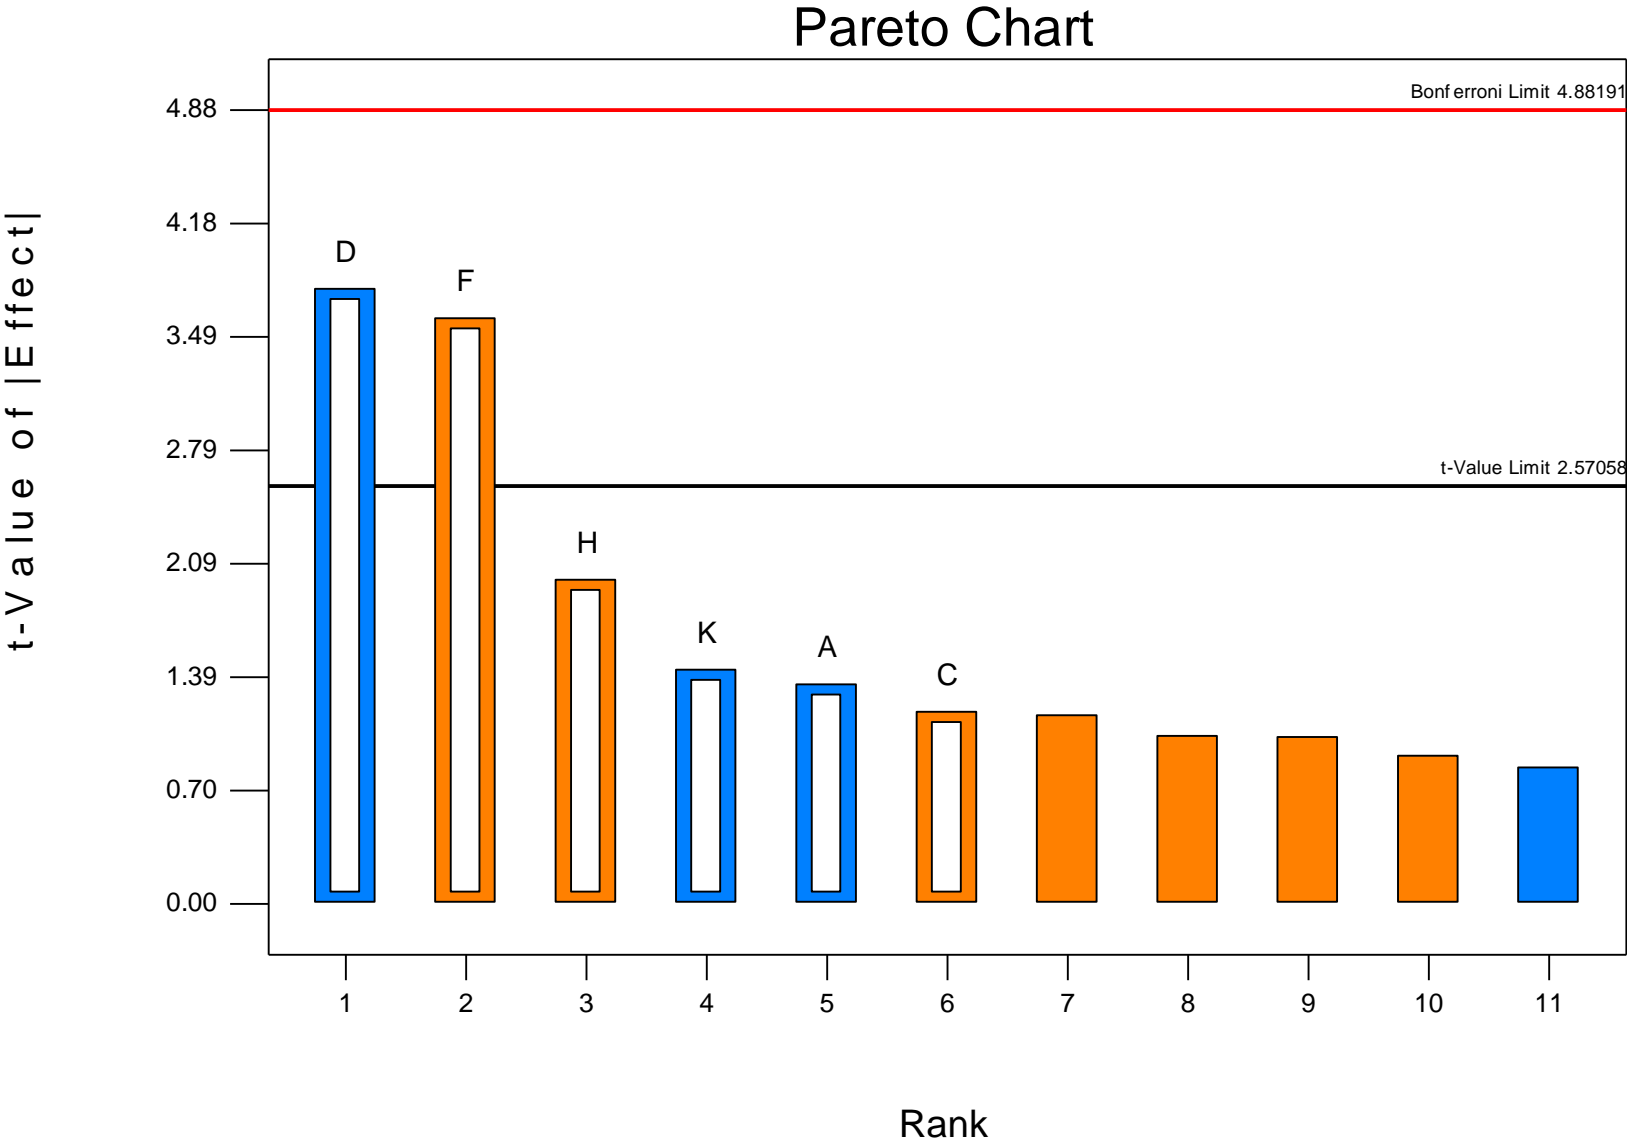

Fig S19: Pareto chart of the effects of chemical compounds predicted by flux balance analysis (FBA) on the expression level of YALI0D17556g in the engineered strain Po1f-1312E+1269IB in the second tour PBD

- A: KH<sub>2</sub>PO<sub>4</sub>
- B: (NH<sub>4</sub>)<sub>2</sub>SO<sub>4</sub>
- C: L Lysine
- D: L Tryptophan
- E: Ergosterol
- F: Ethanolamine
- G: L Asparagine
- H: L isoleucine
- J: D glucose
- K: D Fructose
- L: Thiamine
- Positive Effects
- Negative Effects

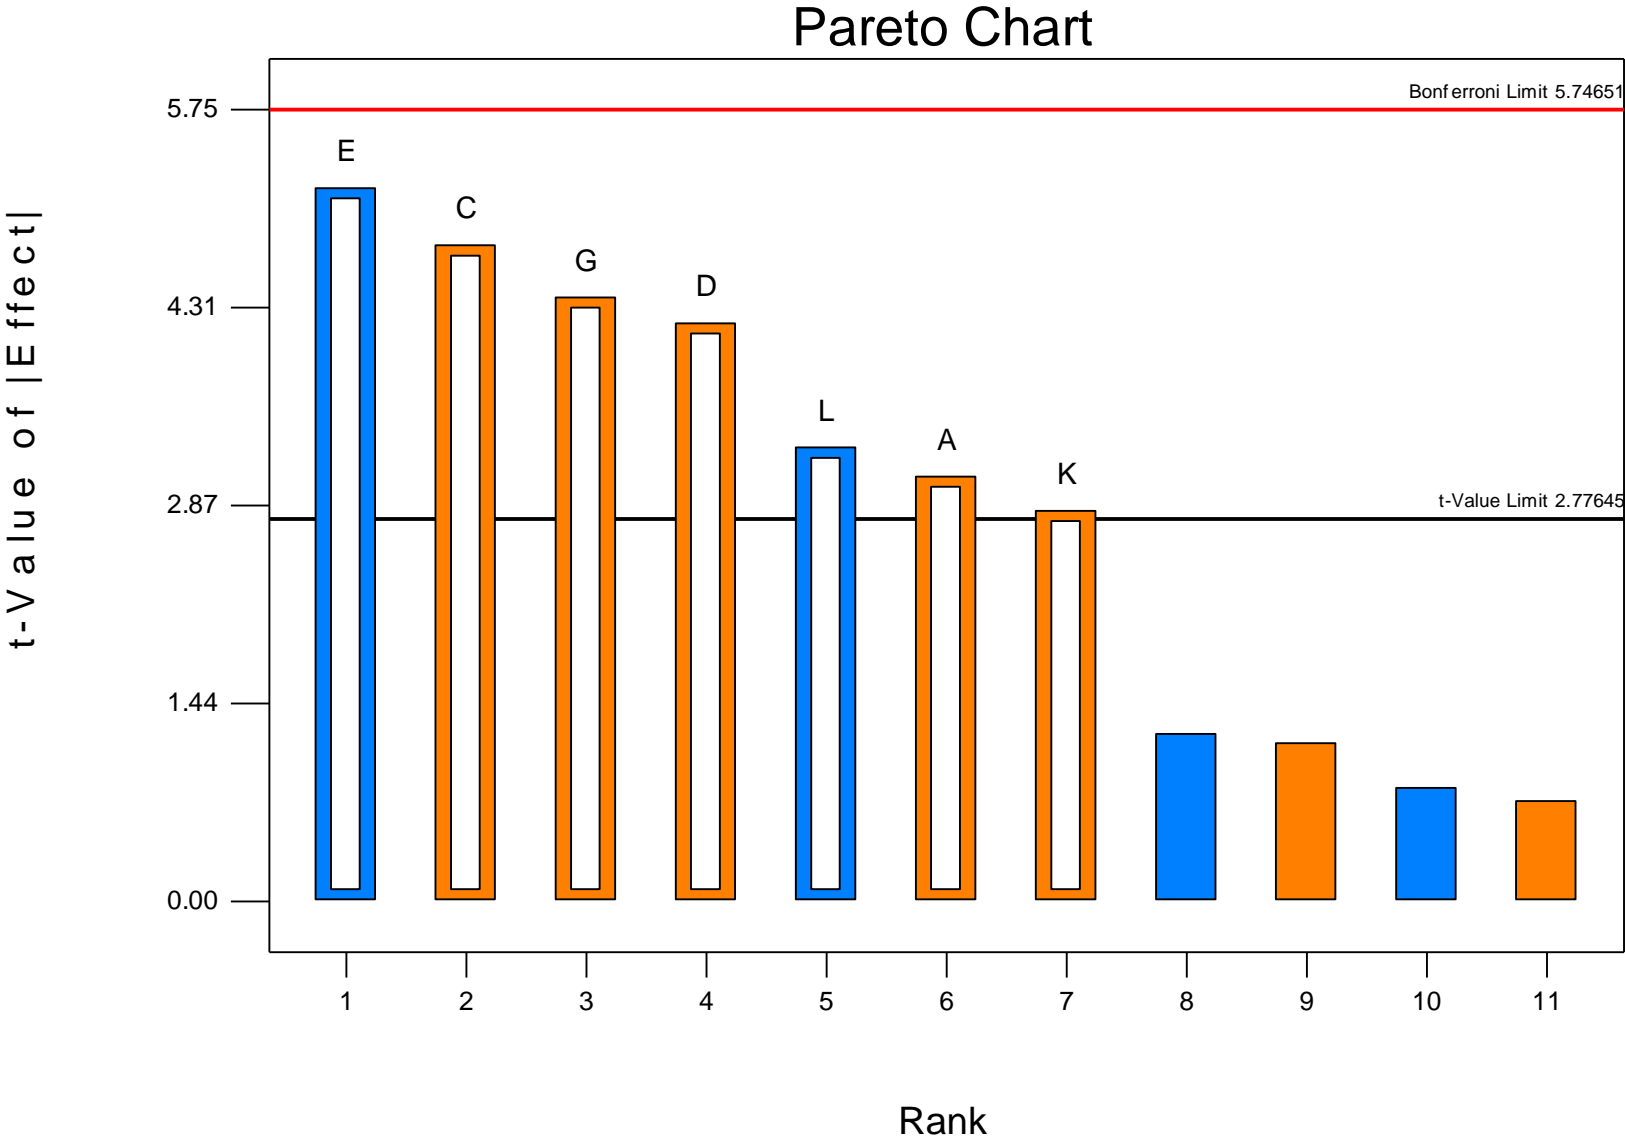

Fig S20: Pareto chart of the effects of chemical compounds predicted by flux balance analysis (FBA) on the expression level of YALI0E04807g in the engineered strain Po1f-1312E+1269IB in the second tour PBD

- A: KH<sub>2</sub>PO<sub>4</sub>
- B: (NH<sub>4</sub>)<sub>2</sub>SO<sub>4</sub>
- C: L Lysine
- D: L Tryptophan
- E: Ergosterol
- F: Ethanolamine
- G: L Asparagine
- H: L isoleucine
- J: D glucose
- K: D Fructose
- L: Thiamine
- Positive Effects
- Negative Effects

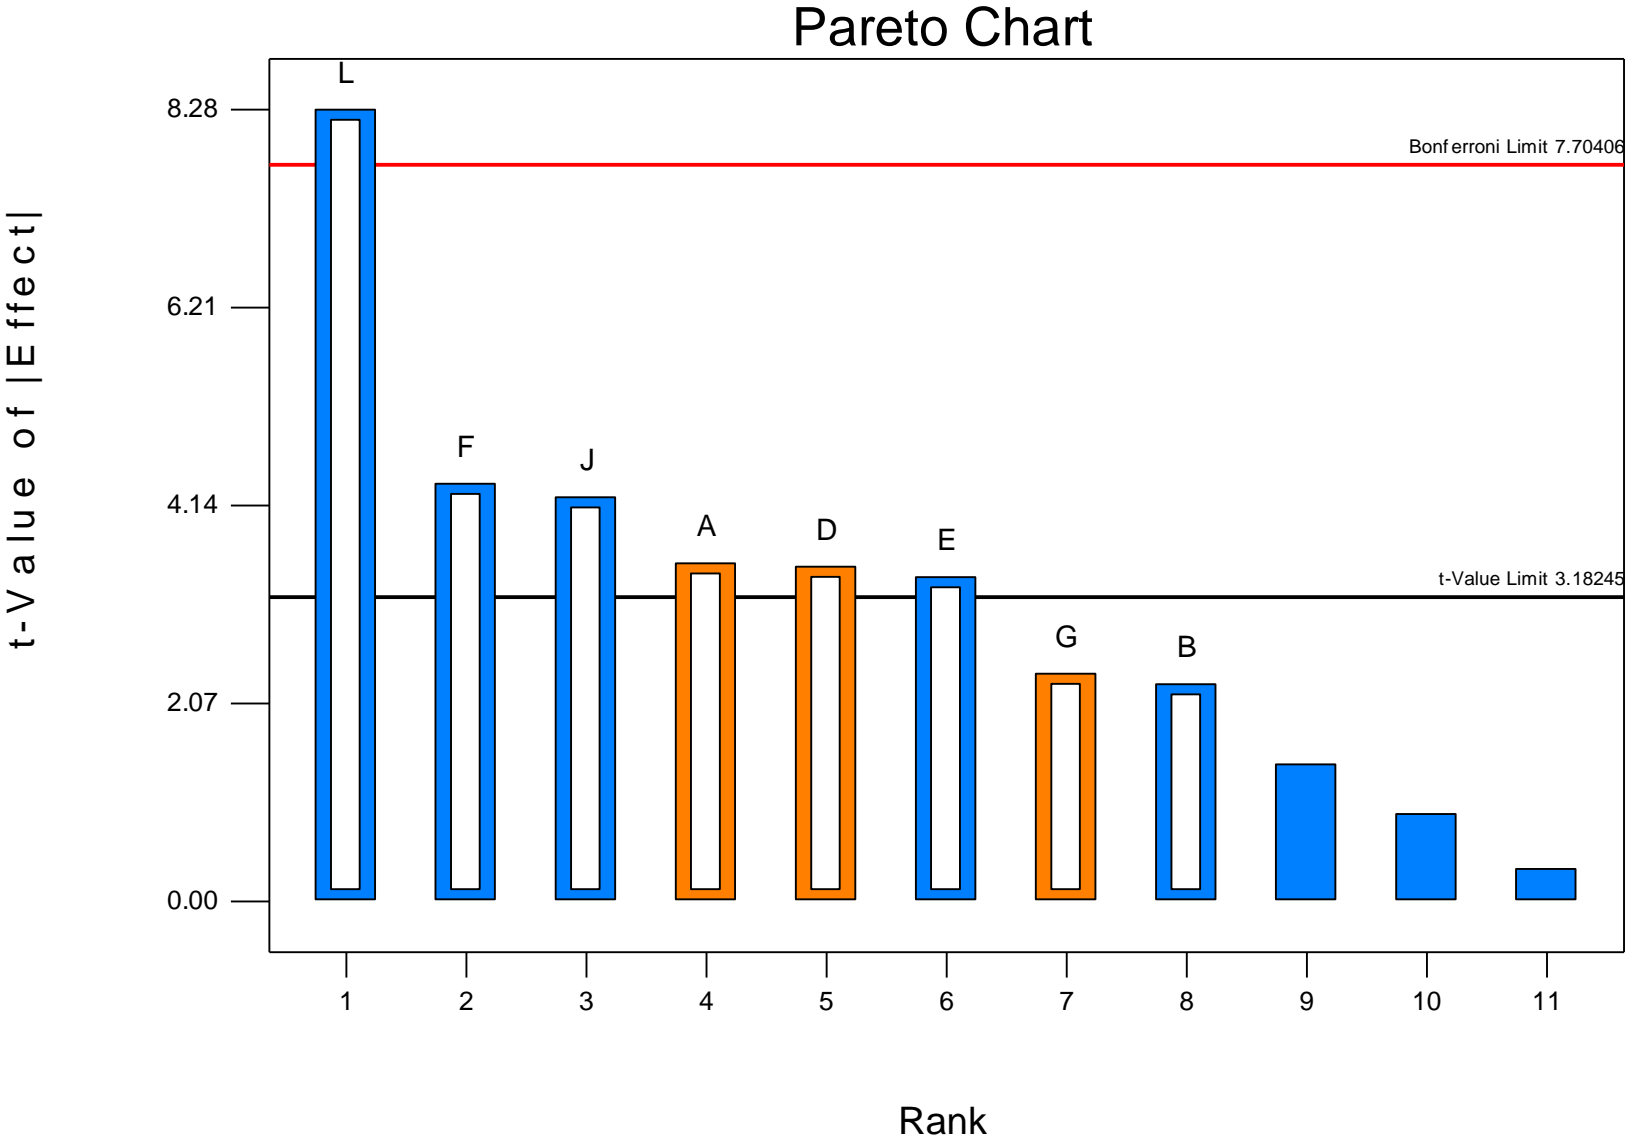

Fig S21: Pareto chart of the effects of chemical compounds predicted by flux balance analysis (FBA) on the expression level of YALI0E05753g in the engineered strain Po1f-1312E+1269IB in the second tour PBD

A: KH<sub>2</sub>PO<sub>4</sub>  
B: (NH<sub>4</sub>)<sub>2</sub>SO<sub>4</sub>  
C: L Lysine  
D: L Tryptophan  
E: Ergosterol  
F: Ethanolamine  
G: L Asparagine  
H: L isoleucine  
J: D glucose  
K: D Fructose  
L: Thiamine  
■ Positive Effects  
■ Negative Effects

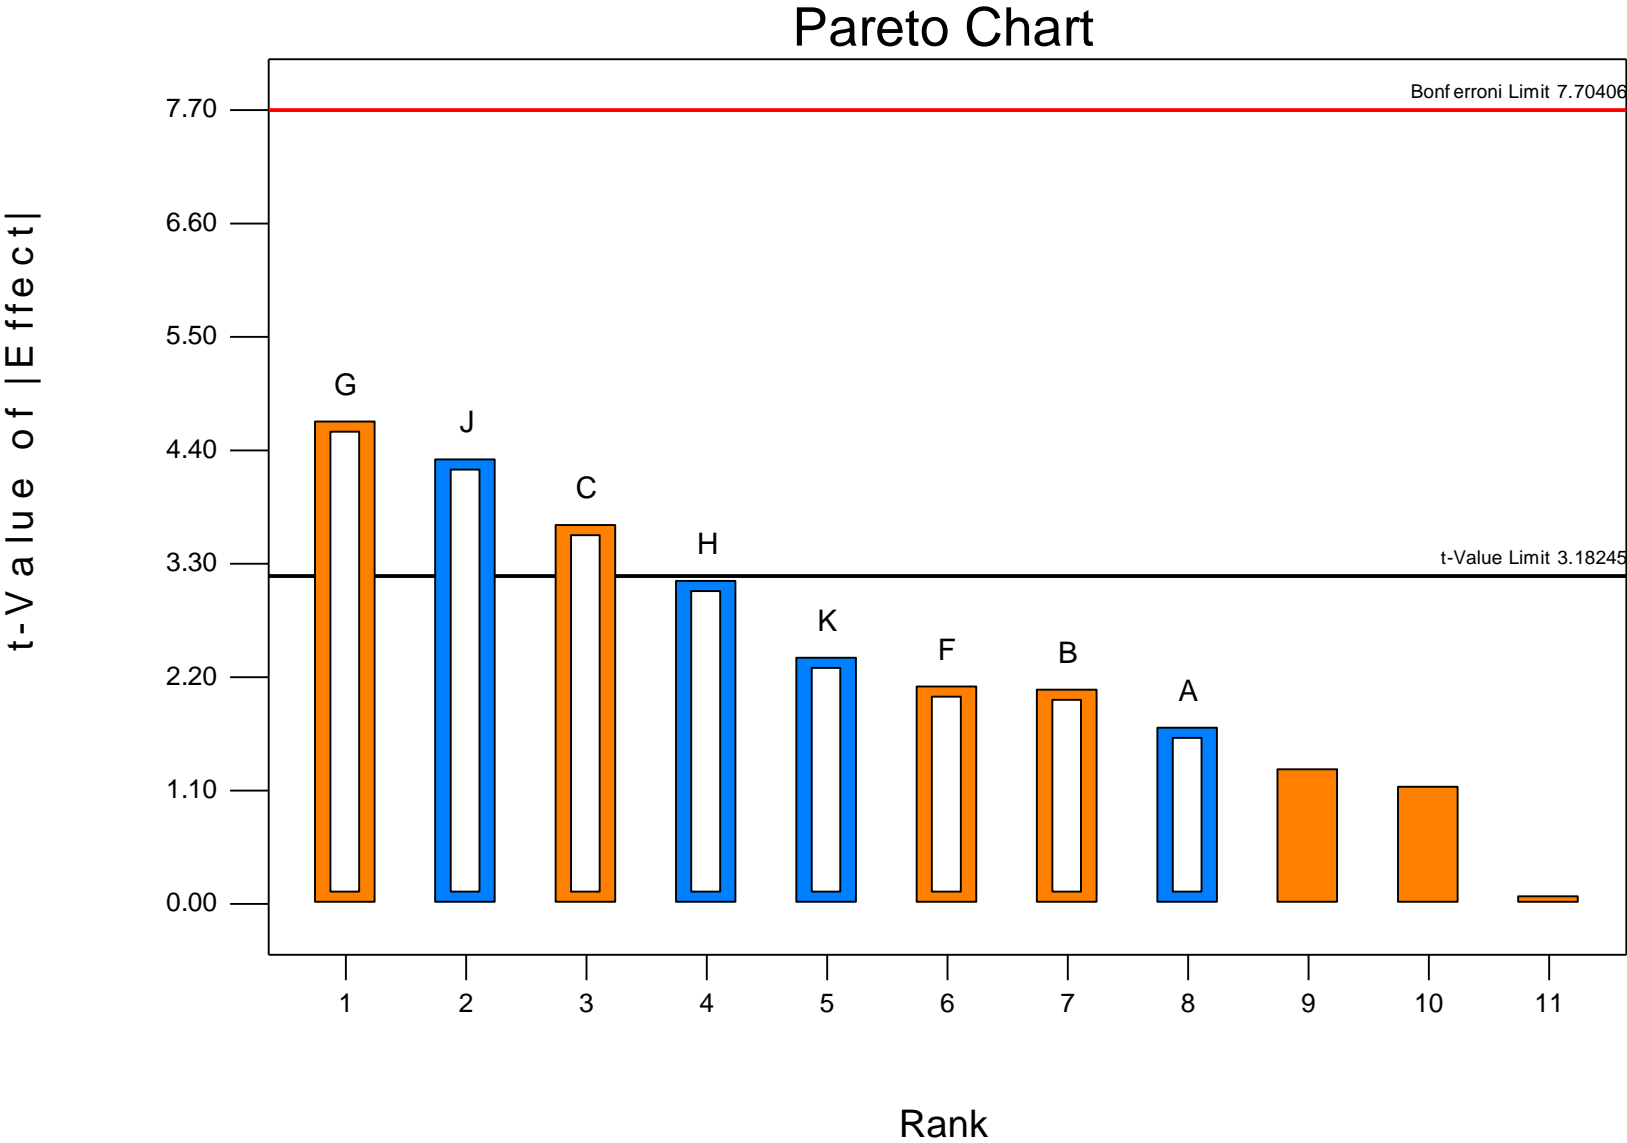

Fig S22: Pareto chart of the effects of chemical compounds predicted by flux balance analysis (FBA) on the expression level of YALI0E06193g in the engineered strain Po1f-1312E+1269IB in the second tour PBD

- A: KH<sub>2</sub>PO<sub>4</sub>
- B: (NH<sub>4</sub>)<sub>2</sub>SO<sub>4</sub>
- C: L Lysine
- D: L Tryptophan
- E: Ergosterol
- F: Ethanolamine
- G: L Asparagine
- H: L isoleucine
- J: D glucose
- K: D Fructose
- L: Thiamine
- Positive Effects
- Negative Effects

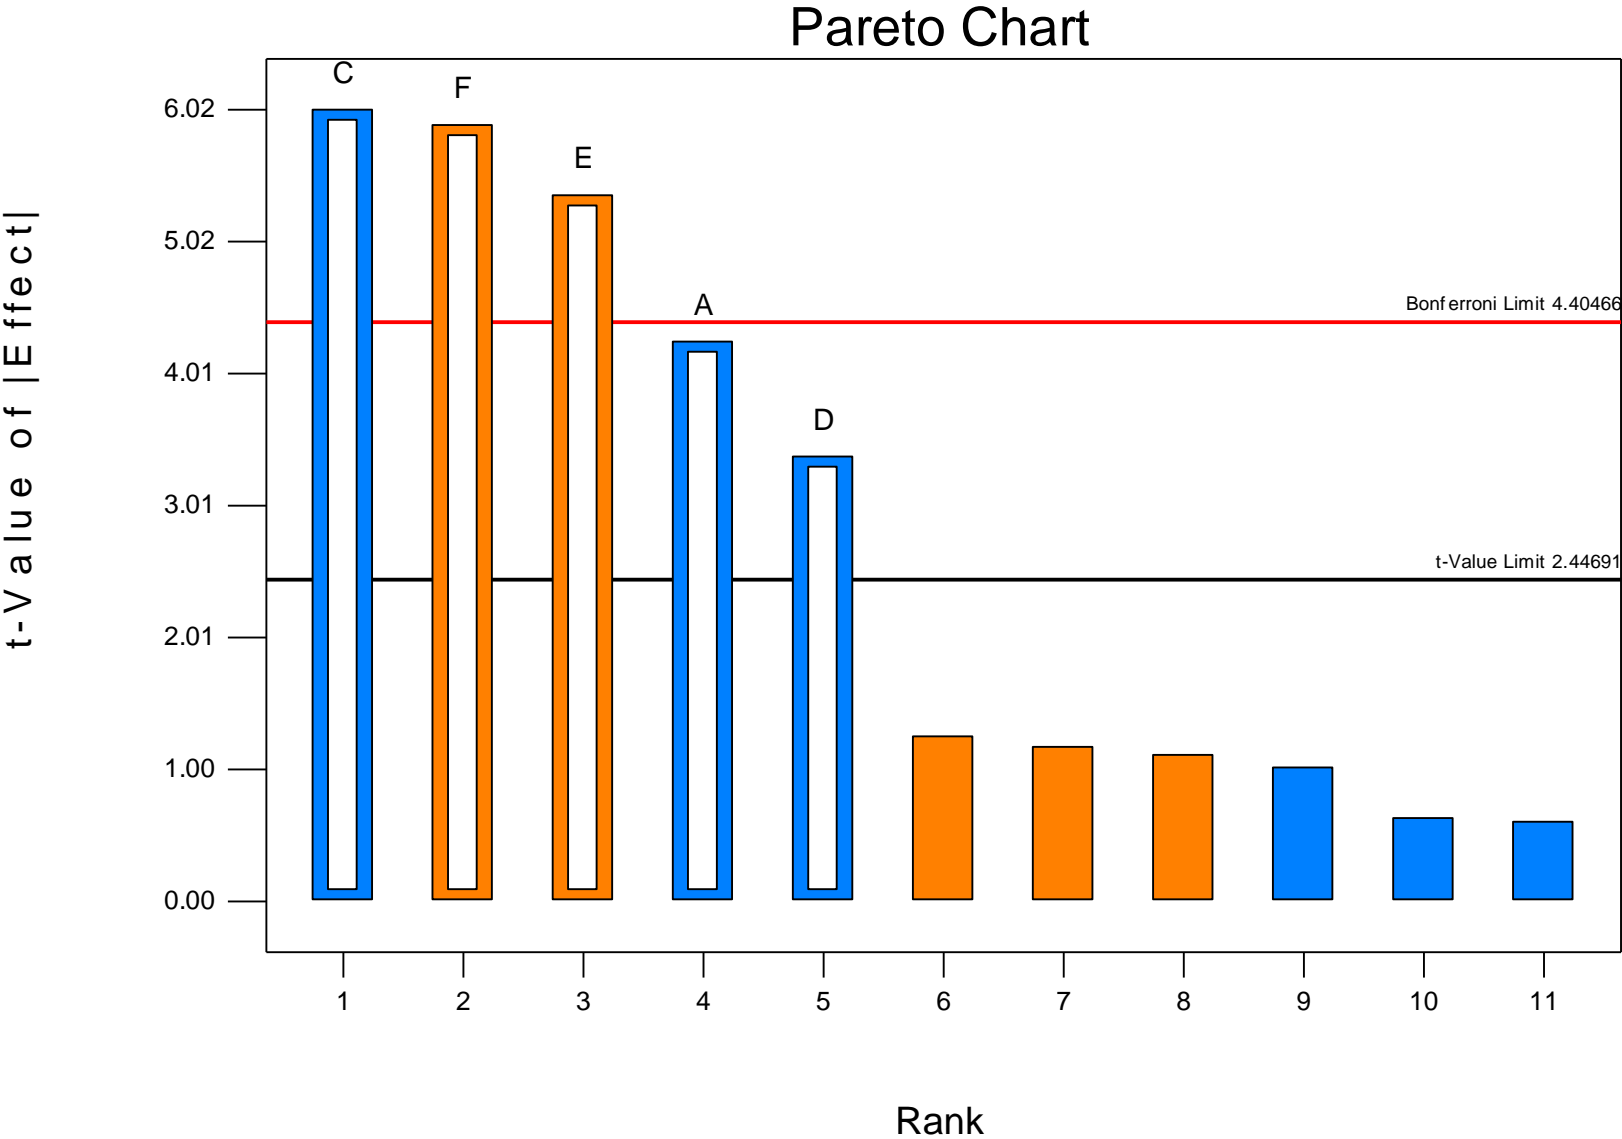

Fig S23: Pareto chart of the effects of chemical compounds predicted by flux balance analysis (FBA) on the expression level of YALI0E11099g in the engineered strain Po1f-1312E+1269IB in the second tour PBD

- A: KH<sub>2</sub>PO<sub>4</sub>
- B: (NH<sub>4</sub>)<sub>2</sub>SO<sub>4</sub>
- C: L Lysine
- D: L Tryptophan
- E: Ergosterol
- F: Ethanolamine
- G: L Asparagine
- H: L isoleucine
- J: D glucose
- K: D Fructose
- L: Thiamine
- Positive Effects
- Negative Effects

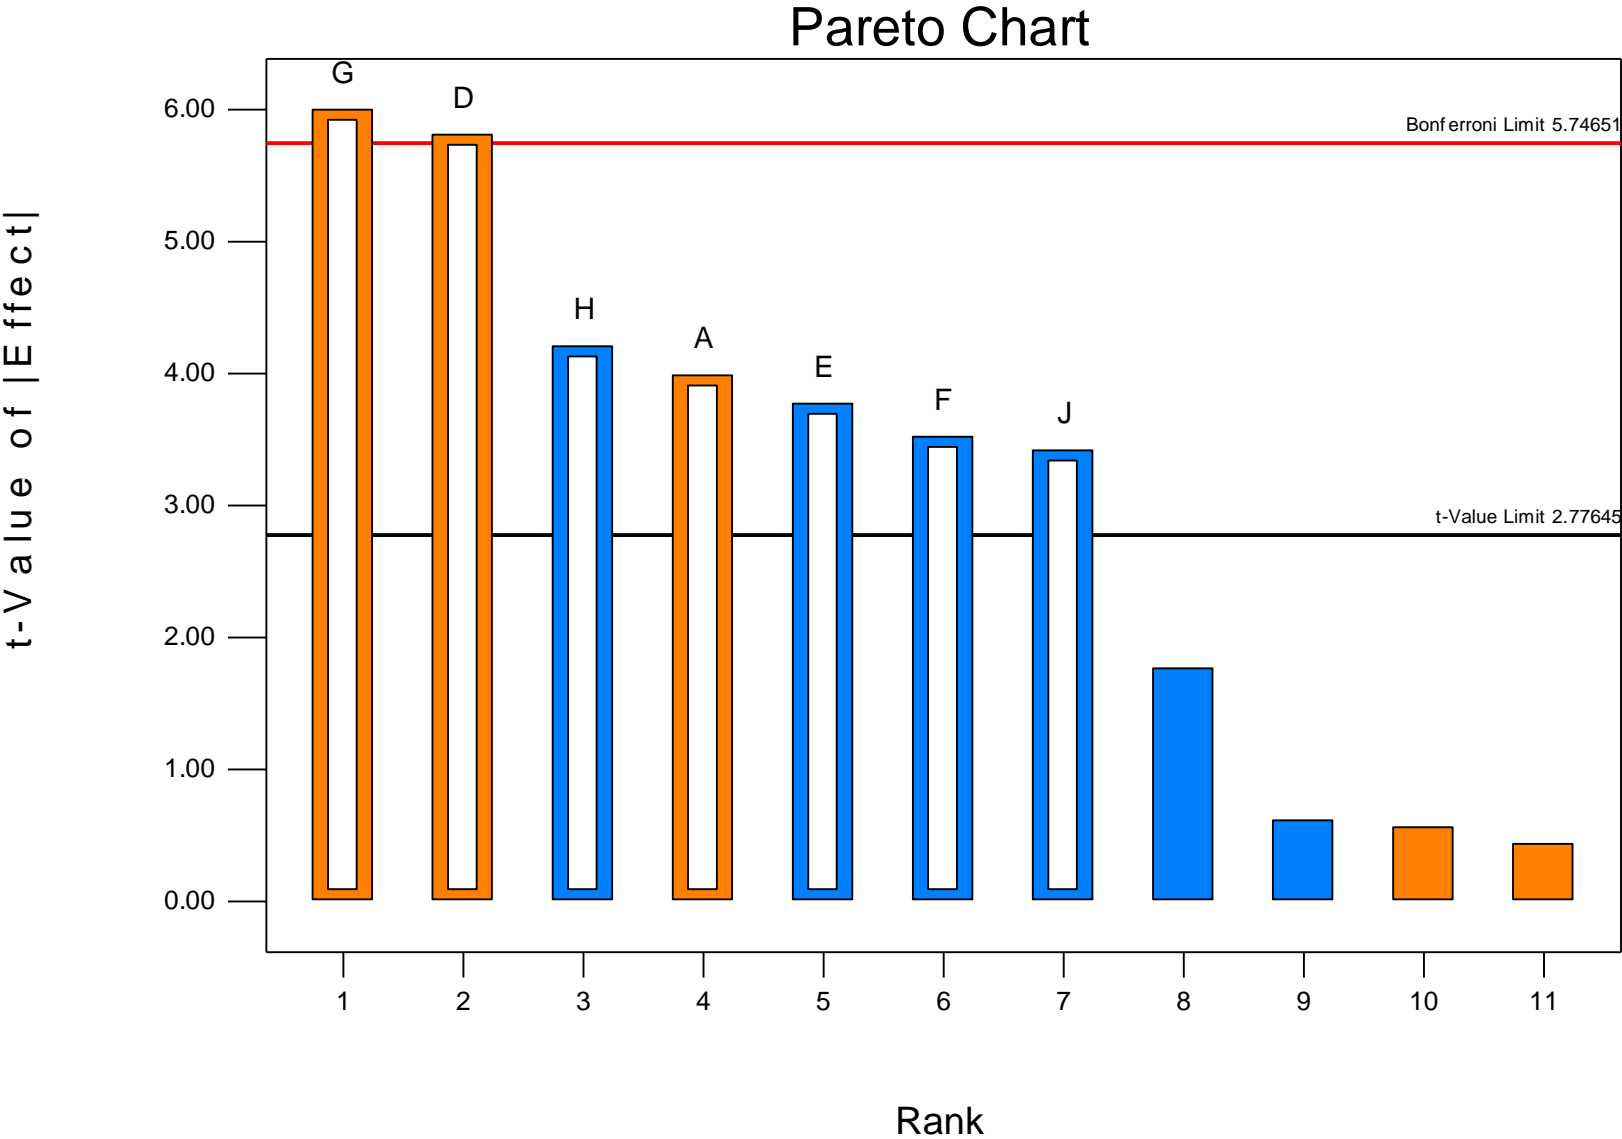

Fig S24: Pareto chart of the effects of chemical compounds predicted by flux balance analysis (FBA) on the expression level of YALI0F04015g in the engineered strain Po1f-1312E+1269IB in the second tour PBD



- A: KH2PO4
- B: (NH4)2SO4
- C: L Lysine
- D: L Tryptophan
- E: Ergosterol
- F: Ethanolamine
- G: L Asparagine
- H: L isoleucine
- J: D glucose
- K: D Fructose
- L: Thiamine
- Positive Effects
- Negative Effects

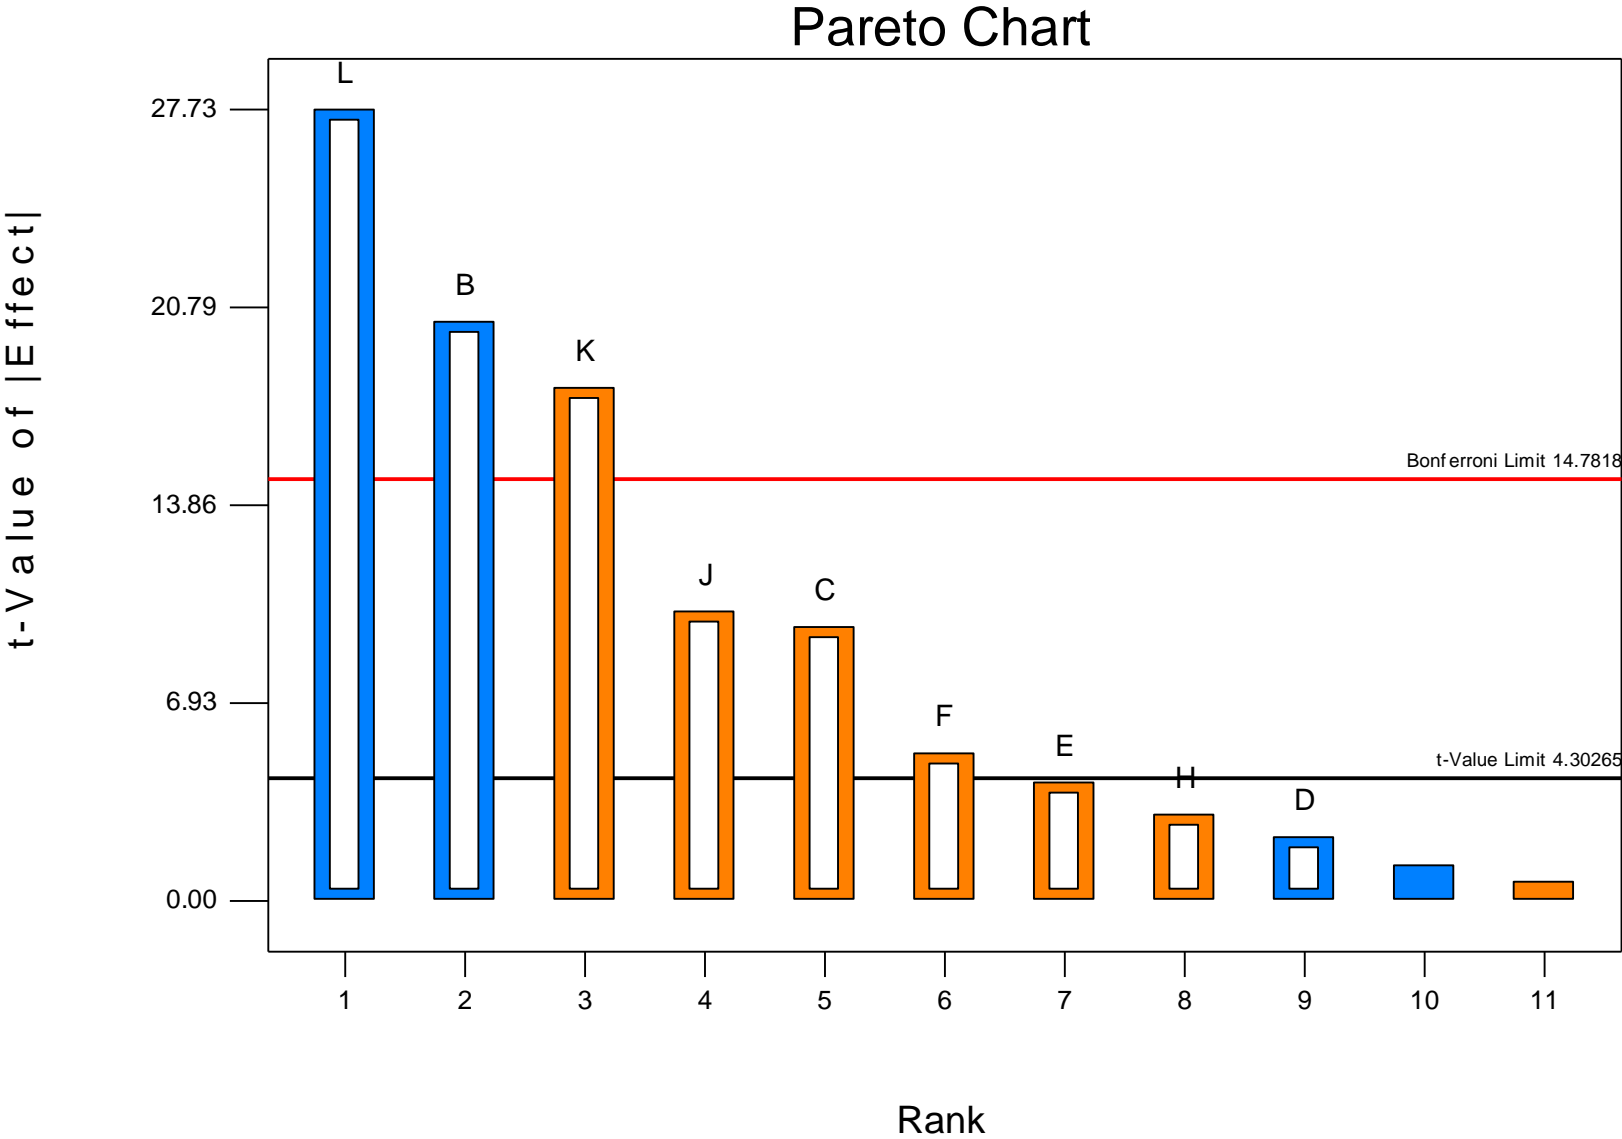

Fig S25: Pareto chart of the effects of chemical compounds predicted by flux balance analysis (FBA) on the expression level of YALI0F05632g the engineered strain Po1f-1312E+1269IB in the second tour PBD

- A: KH<sub>2</sub>PO<sub>4</sub>
  - B: (NH<sub>4</sub>)<sub>2</sub>SO<sub>4</sub>
  - C: L Lysine
  - D: L Tryptophan
  - E: Ergosterol
  - F: Ethanolamine
  - G: L Asparagine
  - H: L isoleucine
  - J: D glucose
  - K: D Fructose
  - L: Thiamine
- Positive Effects  
■ Negative Effects

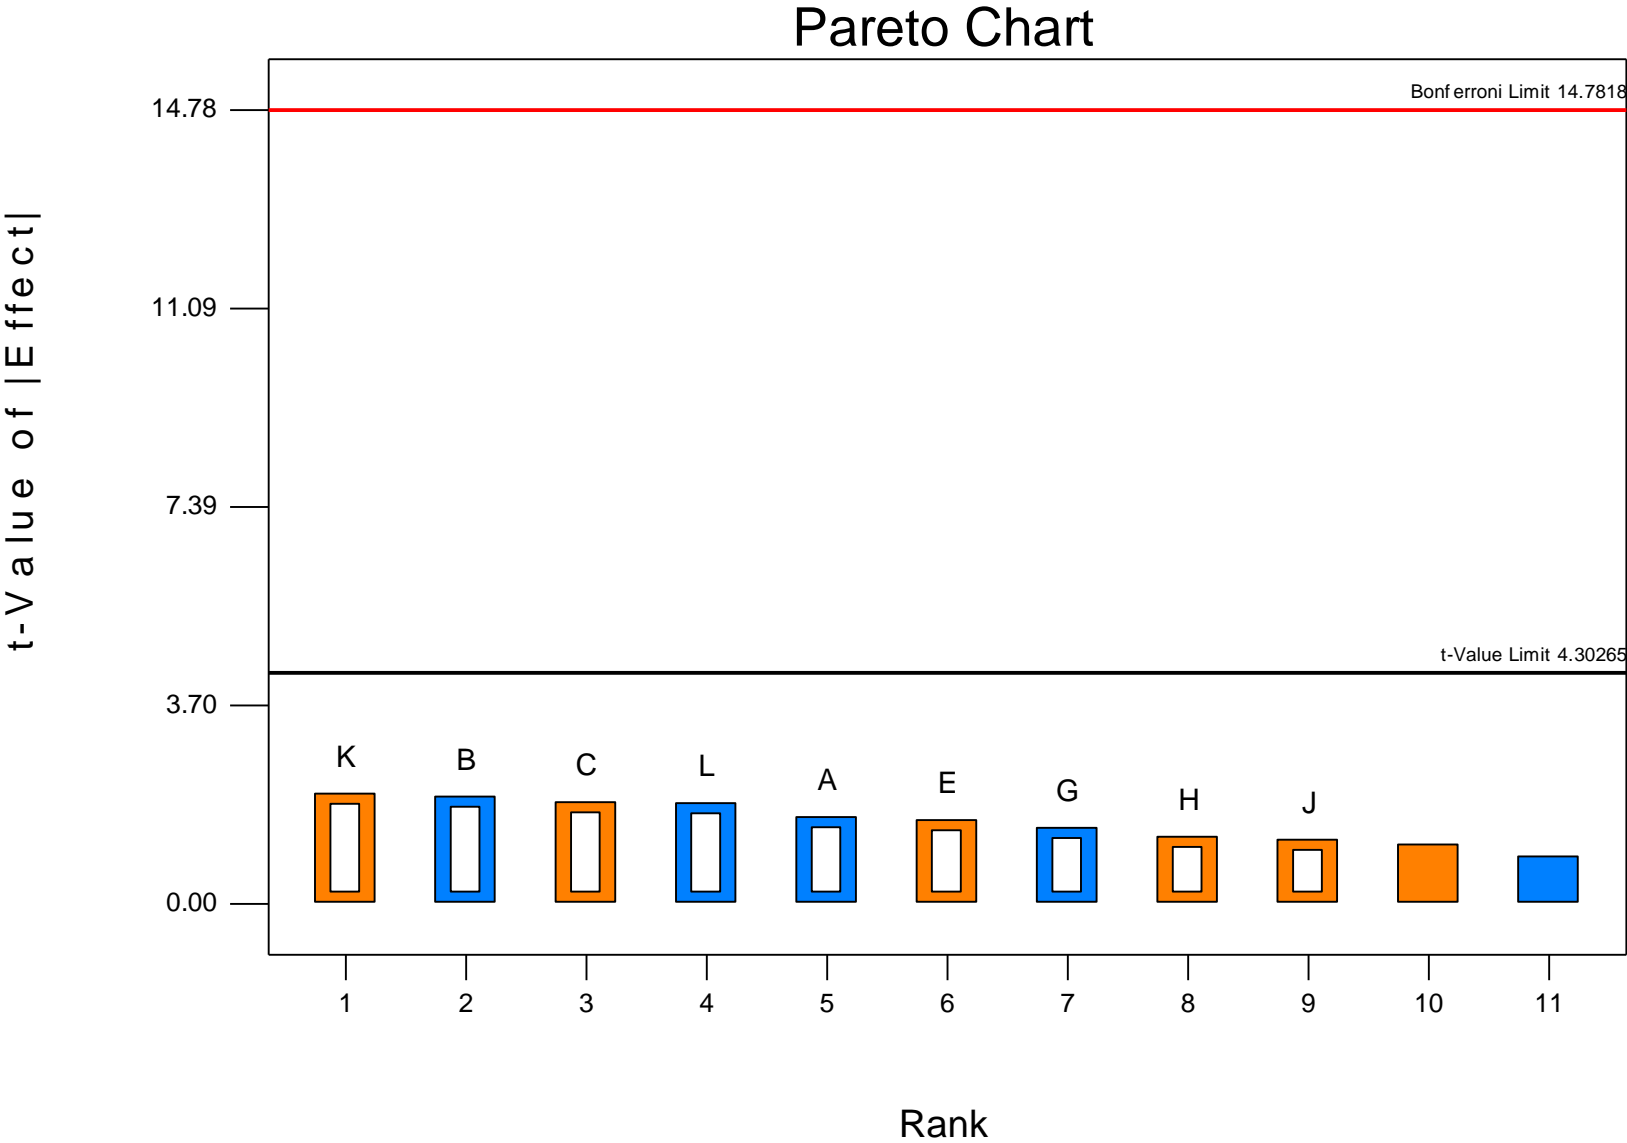

Fig S26: Pareto chart of the effects of chemical compounds predicted by flux balance analysis (FBA) on the expression level of YALI0F30481g in the engineered strain Po1f-1312E+1269IB in the second tour PBD

- A: KH<sub>2</sub>PO<sub>4</sub>
  - B: (NH<sub>4</sub>)<sub>2</sub>SO<sub>4</sub>
  - C: L Lysine
  - D: L Tryptophan
  - E: Ergosterol
  - F: Ethanolamine
  - G: L Asparagine
  - H: L isoleucine
  - J: D glucose
  - K: D Fructose
  - L: Thiamine
- Positive Effects  
■ Negative Effects

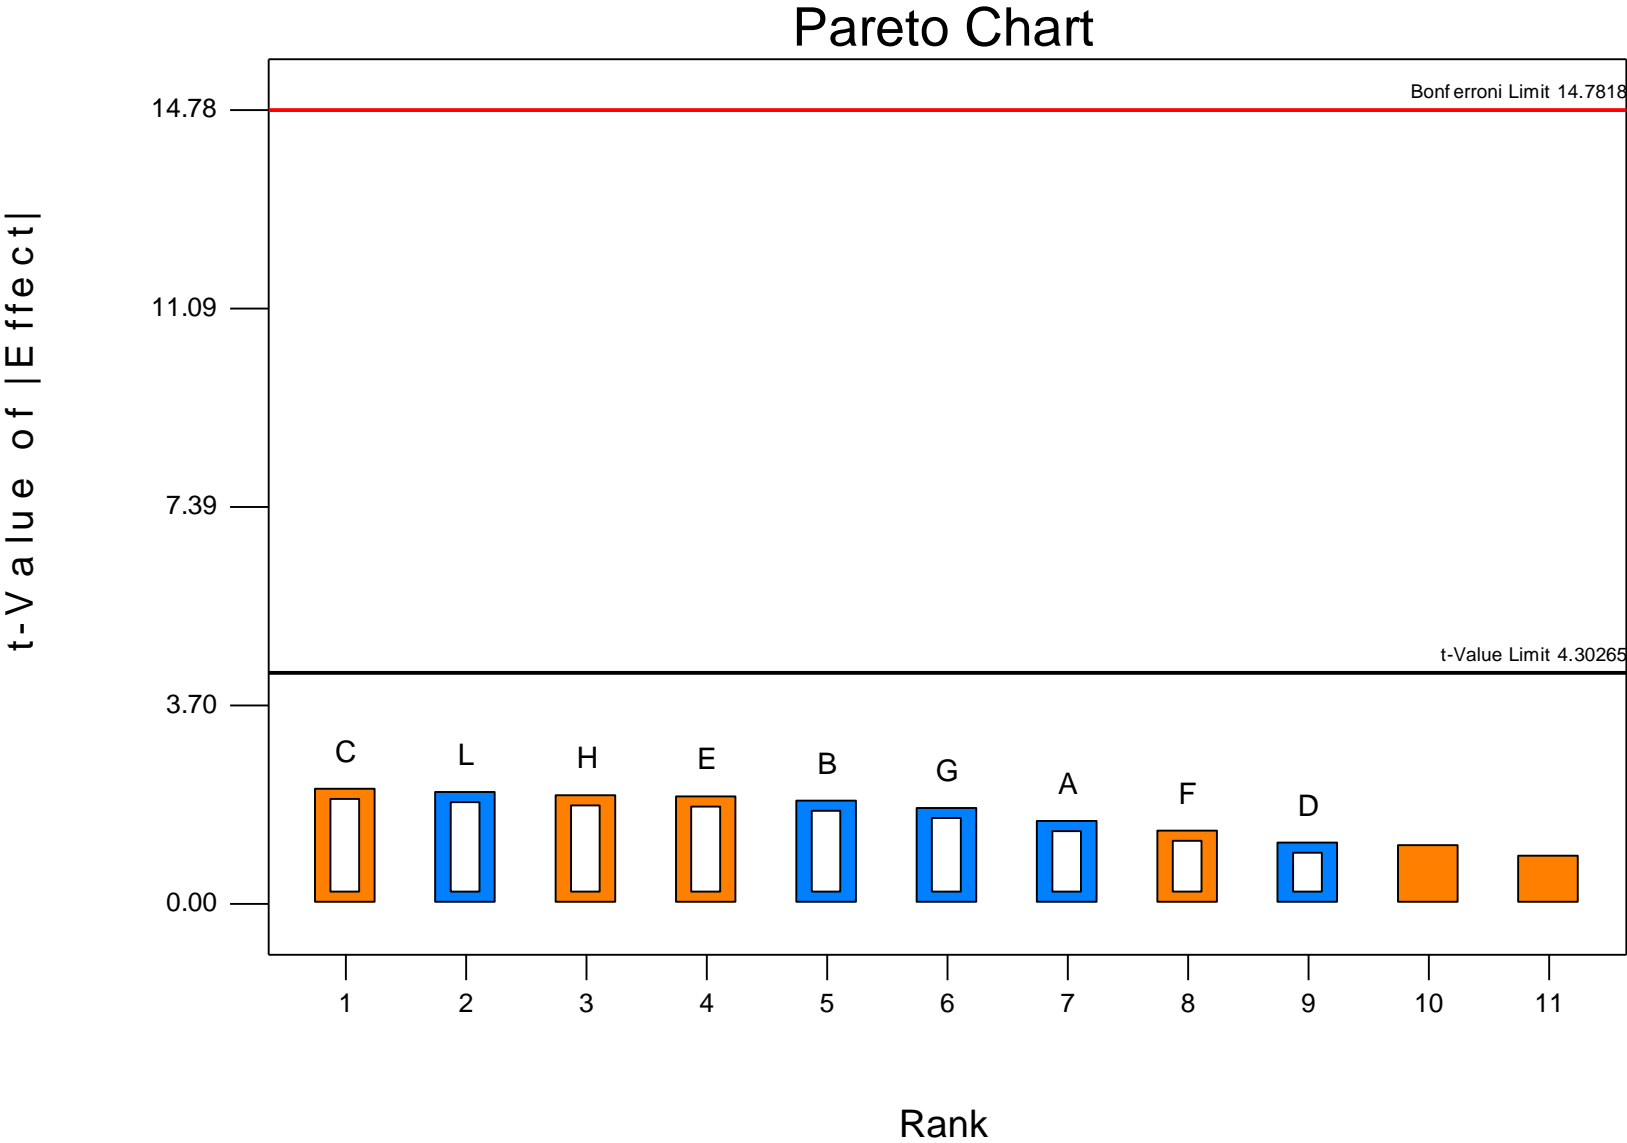

Fig S27: Pareto chart of the effects of chemical compounds predicted by flux balance analysis (FBA) on the expression level of zwf in the engineered strain Po1f-1312E+1269IB in the second tour PBD

- A: KH<sub>2</sub>PO<sub>4</sub>
- B: (NH<sub>4</sub>)<sub>2</sub>SO<sub>4</sub>
- C: L Lysine
- D: L Tryptophan
- E: Ergosterol
- F: Ethanolamine
- G: L Asparagine
- H: L isoleucine
- J: D glucose
- K: D Fructose
- L: Thiamine
- Positive Effects
- Negative Effects

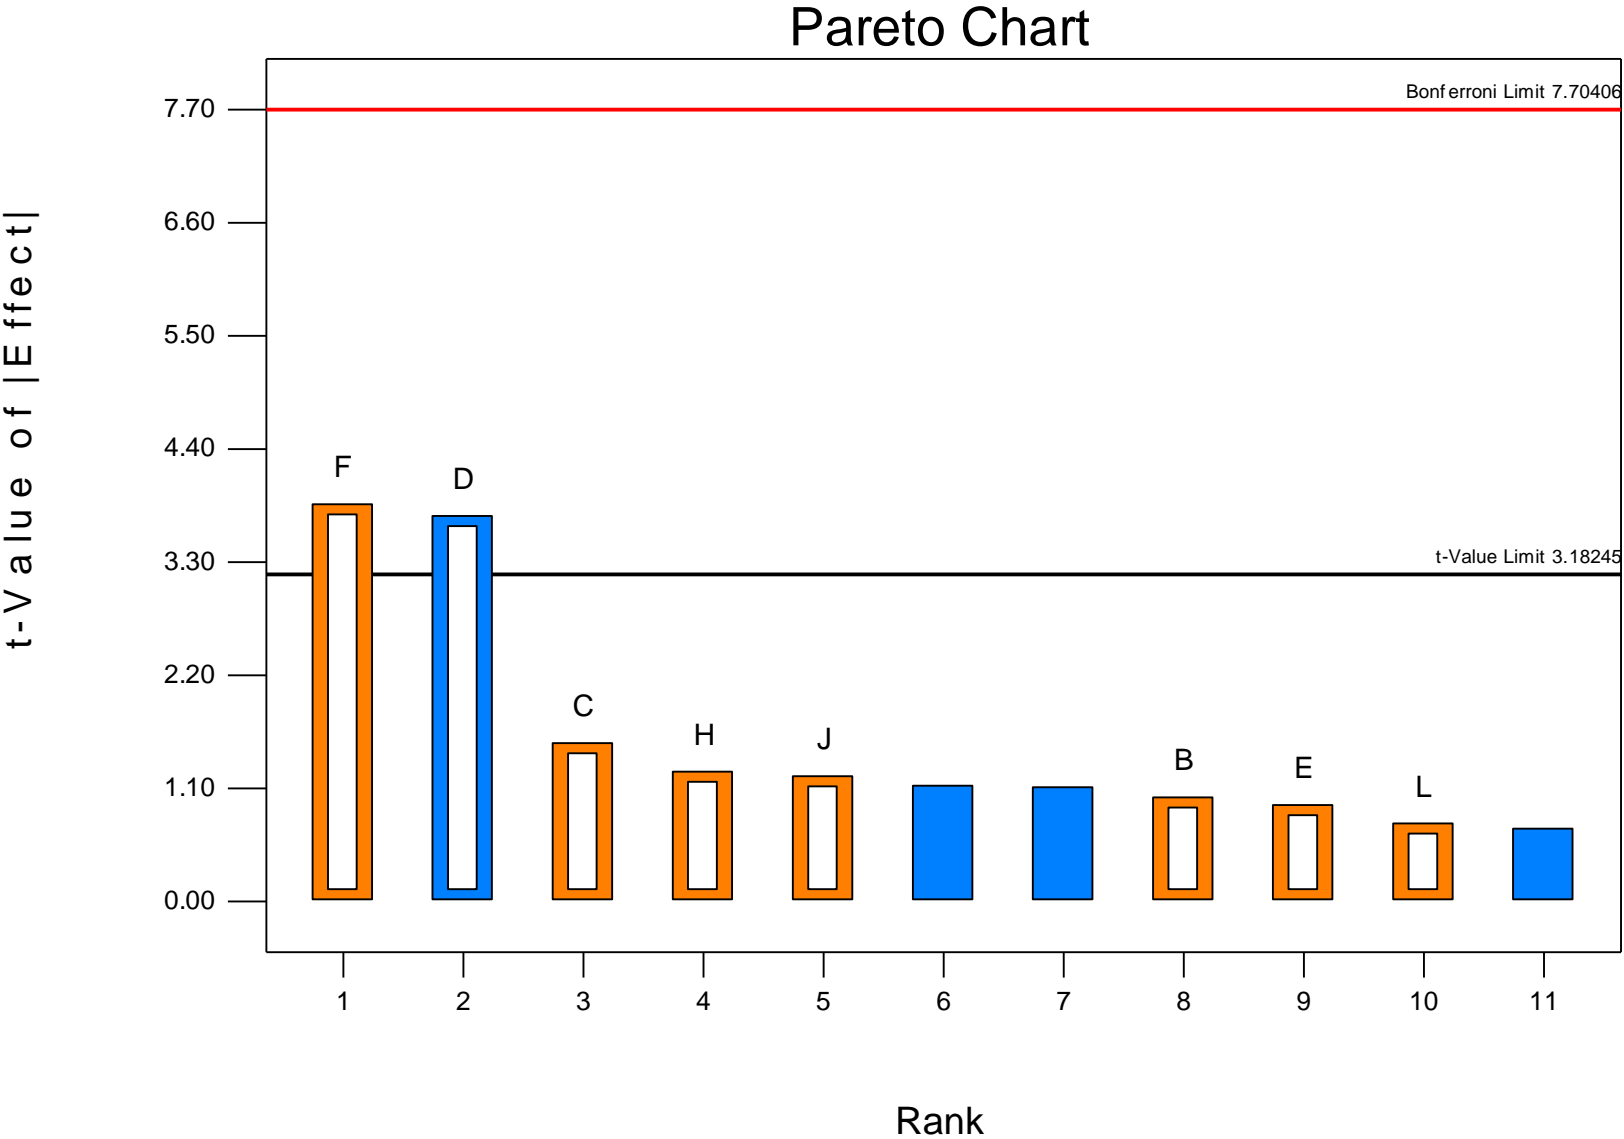

Fig S28: Pareto chart of the effects of chemical compounds predicted by flux balance analysis (FBA) on the expression level of crtE in the engineered strain Po1f-1312E+1269IB in the second tour PBD

- A: KH<sub>2</sub>PO<sub>4</sub>
- B: (NH<sub>4</sub>)<sub>2</sub>SO<sub>4</sub>
- C: L Lysine
- D: L Tryptophan
- E: Ergosterol
- F: Ethanolamine
- G: L Asparagine
- H: L isoleucine
- J: D glucose
- K: D Fructose
- L: Thiamine
- Positive Effects
- Negative Effects

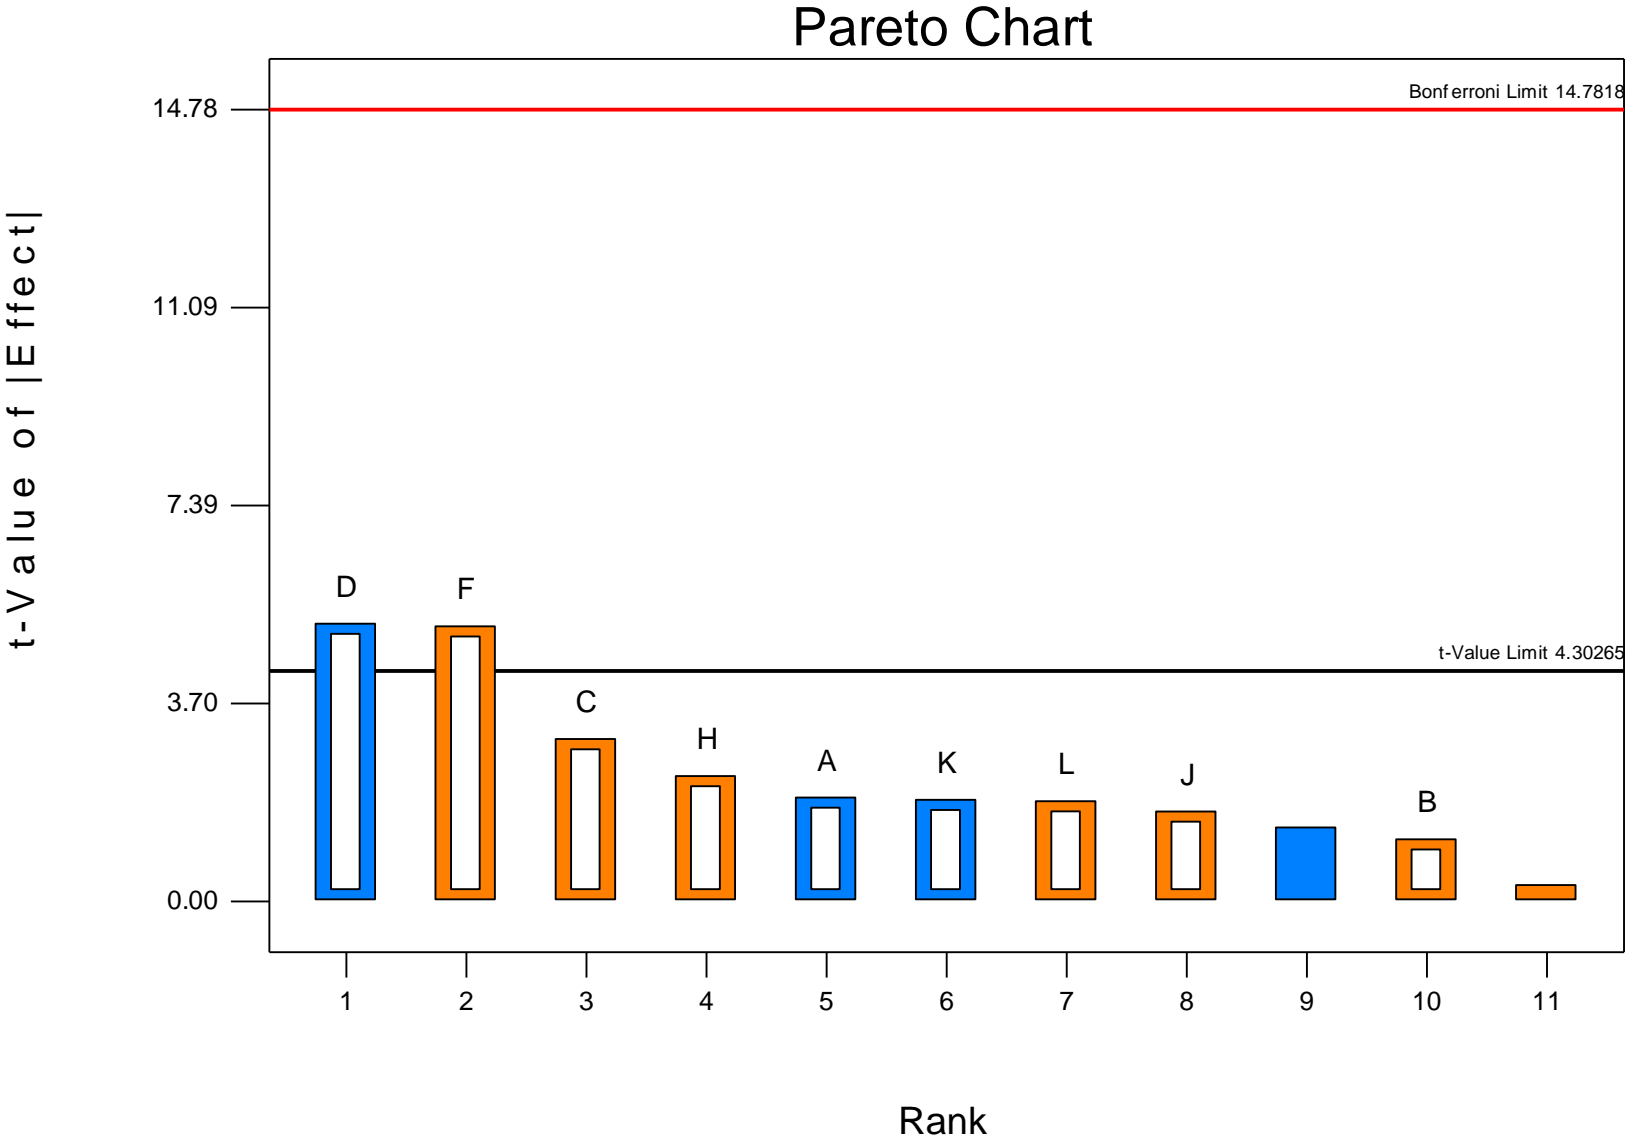

Fig S29: Pareto chart of the effects of chemical compounds predicted by flux balance analysis (FBA) on the expression level of crtB in the engineered strain Po1f-1312E+1269IB in the second tour PBD

A: KH<sub>2</sub>PO<sub>4</sub>  
B: (NH<sub>4</sub>)<sub>2</sub>SO<sub>4</sub>  
C: L Lysine  
D: L Tryptophan  
E: Ergosterol  
F: Ethanolamine  
G: L Asparagine  
H: L isoleucine  
J: D glucose  
K: D Fructose  
L: Thiamine  
■ Positive Effects  
■ Negative Effects

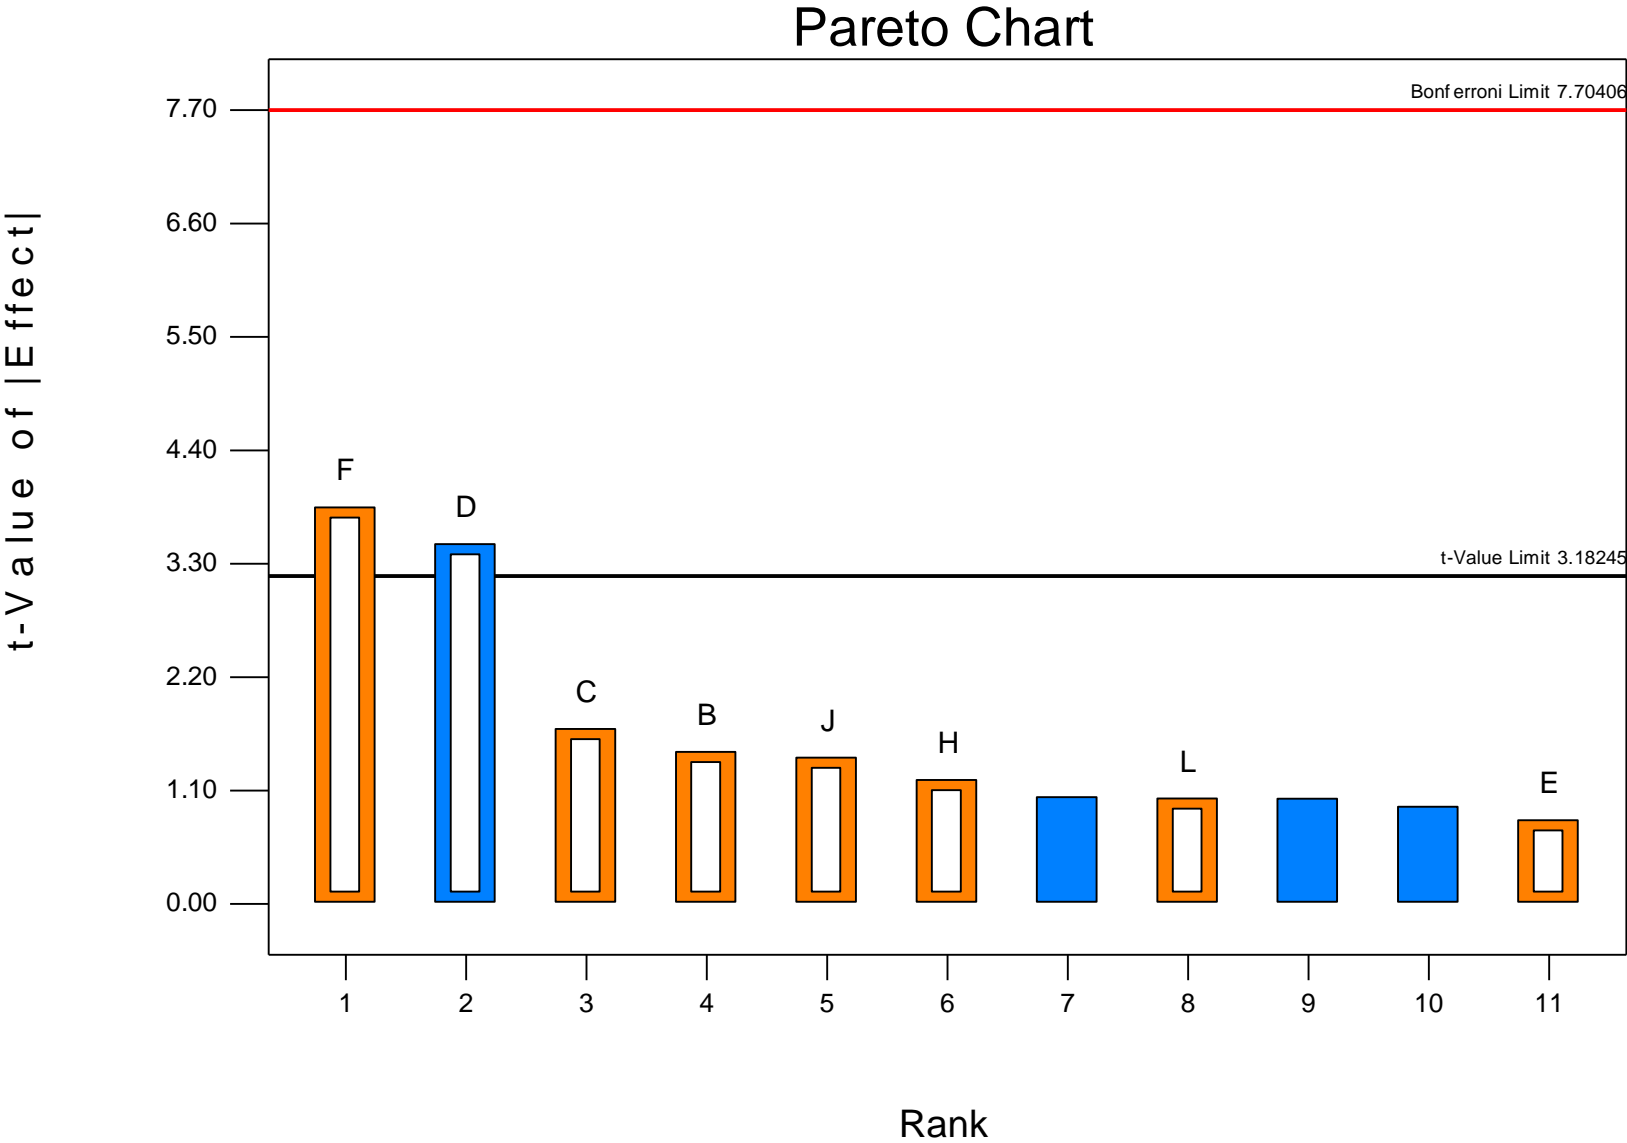

Fig S30: Pareto chart of the effects of chemical compounds predicted by flux balance analysis (FBA) on the expression level of crtI in the engineered strain Po1f-1312E+1269IB in the second tour PBD
