# Supplementary material for: Flux Balance Analysis Inspired Bioprocess Upgrading for Lycopene Production by a Metabolically Engineered Strain of Yarrowia lipolytica
Source: MDPI journal article supplement (doi:10.3390/metabo5040794), 2015-12-21
Supplement: s1 [file s1]

## Supplementary File 5

**Table S1.** Primers used in this study for qRT-PCR. F = forward, R = reverse.

| Primer         | Primer Sequence                 |
|----------------|---------------------------------|
| ACT1-F         | 5' TCCAGGCCGTCCTCTCCC 3'        |
| ACT1-R         | 5' GGCCAGCCATATCGAGTCG 3'       |
| crtE-F         | 5' ATGGTGAGTGGCAGTAAA 3'        |
| crtE-R         | 5' AGGTGATCGTCAATGGAT 3'        |
| crtB-F         | 5' CTCAGACCCGCTATGTCA 3'        |
| crtB-R         | 5' CATCATCAGACCCACCAC 3'        |
| crtI-F         | 5' GCACCATAACCATCTGTTT 3'       |
| crtI-R         | 5' GTAGAGCGAGAAGTCATC 3'        |
| YALI0B08536g-F | 5LI0B08536g-FAGTCATC 3'35       |
| YALI0B08536g-R | 5LI0B08536g-RAGTCATC 3'35       |
| YALI0B16038g-F | 5LI0B16038g-FAGTCATC 3'-3L      |
| YALI0B16038g-R | 5LI0B16038g-RAGTCATC 3'-3L      |
| YALI0B16126g-F | 5LI0B16126g-FAGTCATC 3'         |
| YALI0B16126g-R | 5LI0B16126g-RAGTCATC 3'         |
| YALI0C18755g-F | 5LI0C18755g-FAGTCATC 3'-3L      |
| YALI0C18755g-R | 5LI0C18755g-RAGTCATC 3'-3L      |
| YALI0C18799g-F | 5LI0C18799g-FAGTCATC 3"         |
| YALI0C18799g-R | 5LI0C18799g-RAGTCATC 3"         |
| YALI0D14762g-F | 5LI0D14762g-FAGTCATC 3'GC-30    |
| YALI0D14762g-R | 5LI0D14762g-RAGTCATC 3'CG-30    |
| YALI0D17050g-F | 5LI0D17050g-FAGTCATC 3'35       |
| YALI0D17050g-R | 5LI0D17050g-RAGTCATC 3'         |
| YALI0D17556g-F | 5LI0D17556g-FAGTCATC 3'         |
| YALI0D17556g-R | 5LI0D17556g-FAGTCATC 3'         |
| YALI0E04807g-F | 5LI0E04807g-FAGTCATC 3'T-3I     |
| YALI0E04807g-R | 5LI0E04807g-RAGTCATC 3'A-3I     |
| YALI0E05753g-F | 5LI0E05753g-FAGTCATC 3'-3L      |
| YALI0E05753g-R | 5LI0E05753g-RAGTCATC 3'-3L      |
| YALI0E06193g-F | 5LI0E06193g-FAGTCATC 3'-3L      |
| YALI0E06193g-R | 56193g-R93g-FAGTCATC 3          |
| YALI0E11099g-F | 5LI0E11099g-FAGTCATC 3'GAGAC-31 |
| YALI0E11099g-R | 5LI0E11099g-RAGTCATC 3'CCTTT-31 |
| YALI0F04015g-F | 5LI0F04015g-FAGTCATC 3'35       |
| YALI0F04015g-R | 5LI0F04015g-RAGTCATC 3'         |
| YALI0F05632g-F | 5LI0F05632g-FAGTCATC 3'-3'      |
| YALI0F05632g-R | 5LI0F05632g-RAGTCATC 3'         |
| YALI0F30481g-F | 5LI0F30481g-FAGTCATC 3'-3'y     |
| YALI0F30481g-R | 5LI0F30481g-RAGTCATC 3'-3'      |
| zwf-F          | 5f-FF30481g-RAGTCATC 3'-3'      |
| zwf-R          | 5f-RF30481g-RAGTCATC 3'-3'      |
